# Supplementary material for: The impact of storage conditions on human stool 16S rRNA microbiome composition and diversity
Source: PeerJ journal article supplement (doi:10.7717/peerj.8133), 2019-12-02
Supplement: Code_S2.pdf [file Code_S2.pdf]

```
#####
```

```
# Lauren V Carruthers
```

```
# Pilot Study Paper Alpha Diversity Model LVC
```

```
# R Studio Notebook
```

```
#####
```

```
# Load in required libraries
```

```
``{r}
```

```
library(ggplot2)
```

```
library(lme4)
```

```
library(DHARMA)
```

```
library(RLRSim)
```

```
library("blmeco")
```

```
...
```

```
# Load in data for all alpha diversity models and call it Data
```

```
``{r}
```

```
Data <- read.csv("FILE_LOCATION/FILENAME.csv", header = TRUE, row.names = 1)
```

```
head(Data)
```

```
...
```

```
# There are 4 explanatory variables and a random effect variable (child)
```

```
# - category # (= stool region)
```

```
# - treatment # (= stool storage preservation method)
```

```
# - time # (= time-to-freezing of stool considered as a continuous variable)
```

```
# - as.factor(time) # (= time-to-freezing of stool as a factor)
```

```
# category was only compared at one time point therefore category time interactions are not included here.
```

# Therefore the following interaction to consider are:

# - treatment:category

# - treatment:time

# - treatment:as.factor(time)

# : only test method:time for example.

# \* will test method:time, method and time.

# Note that time (continuous) and as.factor(time) (not continuous) cannot be tested in the same model so run two separate models to see which is best.

# Set child as a factor

```
``{r}
```

```
Data$child <- as.factor(Data$child)
```

```
````
```

# Include child as a random effect, only 3 children in this study.

# Shannon models s

# Richness models r

# Simpson models p

# Using backward elimination to create the models

```
####
```

```
# Shannon Model Code
```

```
# Create a null model with just children as a random effect
```

```
``{r}
```

```
s0 <- lmer(shannon ~ 1 + (1 | child), data = Data)
```

```
summary(s0)
```

```
...
```

```
# Now create full model s1 using continuous time
```

```
``{r}
```

```
s1 <- lmer(shannon ~ treatment + time + category + treatment:time + treatment:category +  
(1 | child), data = Data)
```

```
summary(s1)
```

```
...
```

```
# Compare s0 and s1:
```

```
``{r}
```

```
anova(s0, s1, test = "Chisq")
```

```
...
```

```
# s1 is not significantly different to s0 so retain s0 ( $p > 0.05$ )
```

```
# None of the model components are significant predictors of shannon diversity, double check by  
backward elimination. s0 best fit model.
```

```
# Create model s2 removing treatment:category
```

```
``{r}
```

```
s2 <- lmer(shannon ~ treatment + time + category + treatment:time + (1 | child), data = Data)
```

```
summary(s2)
```

```
...
```

```
# Compare model s2 with model s0
```

```

``{r}
anova (s0,s2, test = "Chisq")
...

# s2 is not significantly different to s0 so retain s0 (p > 0.05)

# Create model s3 removing treatment:time
``{r}
s3 <- lmer(shannon ~ treatment + time + category + (1 | child), data = Data)
summary(s3)
...

# Compare model s3 with s0
``{r}
anova(s0,s3,test="Chisq")
...

# s3 is not significantly different to s0 so retain s0 (p > 0.05)

# Create model s4 removing category
``{r}
s4 <- lmer(shannon ~ treatment + time + (1 | child), data = Data)
summary(s4)
...

# Compare model s0 and s4
``{r}
anova(s0,s4,test="Chisq")
...

# s4 is not significantly different to s0 so retain s0 (p > 0.05)

# Create model s5 removing time
``{r}

```

```
s5 <- lmer(shannon ~ treatment + (1 | child), data = Data)
summary(s5)
...

# Compare model s0 and s5
``{r}
anova(s0,s5,test="Chisq")
...

# s5 is not significantly different to s0 so retain s0 (p > 0.05)
```

#Therefore s0 is the best fit model here.

```
# Now create full model s6 using as.factor(time)
``{r}
s6 <- lmer(shannon ~ treatment + as.factor(time)+ category + as.factor(time):treatment +
treatment:category + (1 | child), data= Data)
summary(s6)
...

# Compare model s0 and s6
``{r}
anova(s0,s6,test="Chisq")
...

# s6 is not significantly different to s0 so retain s0 (p > 0.05)
```

```
#Create model s7 removing treatment:category
``{r}
s7 <- lmer(shannon ~ treatment + as.factor(time)+ category + as.factor(time):treatment + (1 | child),
data= Data)
summary(s7)
...

```

```

# Compare model s0 and s7
``{r}
anova(s0,s7,test="Chisq")
...

# s7 is not significantly different to s0 so retain s0 (p > 0.05)

# Create model s8 removing as.factor(time):treatment
``{r}
s8 <- lmer(shannon ~ treatment + as.factor(time)+ category + (1 | child), data= Data)
summary(s8)
...

# Compare model s0 and s8
``{r}
anova(s0,s8,test="Chisq")
...

# s8 is not significantly different to s0 so retain s0 (p > 0.05)

# Create model s9 removing as.factor(time)
``{r}
s9 <- lmer(shannon ~ treatment + category + (1 | child), data= Data)
summary(s9)
...

# Compare model s0 and s9
``{r}
anova(s0,s9,test="Chisq")
...

# s9 is not significantly different to s0 so retain s0 (p > 0.05)

# s0 <- lmer(shannon ~ 1 + (1 | child), data = Data) is the best fit model here.

```

```

# Check the residuals of the model s0 are normally distributed
```{r}
hist(residuals(s0))
...

# Compare the residuals with the fitted values
```{r}
plot(s0,type=c("p","smooth"))
...

# Perform a qqnorm plot to evaluate the assumption of the normality of the residuals
```{r}
residuals_shannon =simulateResiduals(s0)
...

```{r}
testUniformity(simulationOutput = residuals_shannon)
...

# Check the assumption of equal variance
```{r}
plot(s0, sqrt(abs(resid(.)))~fitted(.), type = c("p", "smooth"), ylab= expression
(sqrt(abs(resid))))
...

# time (continuous or as a factor), category and treatment are not important model components for
shannon diversity prediction

####

# Richness Model Code

# Create a null model with just children as a random effect

```

```

``{r}
r0 <- lmer(richness ~ 1 + (1|child), data = Data)
summary(s0)
...

# Now create full model r1 using continuous time
``{r}
r1 <- lmer(richness ~ treatment + time + category + treatment:time + treatment:category + (1|child),
data = Data)
summary(r1)
...

# Compare r0 and s1:
``{r}
anova(r0, r1, test = "Chisq")
...

# r1 is significantly different to r0 so retain r1 (p < 0.05)

# Create model r2 removing treatment:category
``{r}
r2 <- lmer(richness ~ treatment + time + category + treatment:time + (1|child), data = Data)
summary(r2)
...

# Compare model r2 with model r1
``{r}
anova (r1,r2, test = "Chisq")
...

# r2 is not significantly different to r1 so retain r2 (p > 0.05)

# Create model r3 removing treatment:time
``{r}

```



```
r3 <- lmer(richness ~ treatment + time + category + (1|child), data = Data)
summary(r3)
...

# Compare model r3 with r2
``{r}
anova(r2,r3,test="Chisq")
...

# r3 is not significantly different to r2 so retain r3 (p > 0.05)
```

```
# Create model r4 removing category
``{r}
r4 <- lmer(richness ~ treatment + time + (1|child), data = Data)
summary(r4)
...

# Compare model r3 and r4
``{r}
anova(r3,r4,test="Chisq")
...

# r4 is not significantly different to r3 so retain r4 (p > 0.05)
```

```
# Create model r5 removing time
``{r}
r5 <- lmer(richness ~ treatment + (1|child), data = Data)
summary(r5)
...

# Compare model r4 and r5
``{r}
anova(r4,r5,test="Chisq")
...


```

```
# r5 is not significantly different to r4 so retain r5 (p > 0.05)
```

```
# Compare model r0 and r5
```

```
``{r}
```

```
anova(r0,r5,test="Chisq")
```

```
...
```

```
# r5 is significantly different to r0 so retain r5 (p < 0.05)
```

```
# Now create full model r6 using as.factor(time)
```

```
``{r}
```

```
r6 <- lmer(richness ~ treatment + as.factor(time) + category + as.factor(time):treatment +  
treatment:category + (1 | child), data= Data)
```

```
summary(r6)
```

```
...
```

```
# Compare model r0 and r6
```

```
``{r}
```

```
anova(r0,r6,test="Chisq")
```

```
...
```

```
# r6 is significantly different to r0 so retain r6 (p < 0.05)
```

```
# Create model r7 removing treatment:category
```

```
``{r}
```

```
r7 <- lmer(shannon ~ treatment + as.factor(time) + category + as.factor(time):treatment + (1 | child),  
data= Data)
```

```
summary(r7)
```

```
...
```

```
# Compare model r0 and r7
```

```
``{r}
```

```
anova(r0,r7,test="Chisq")
```

```
...
```

```
# r7 is not significantly different to r6 so retain r6 (p > 0.05)
```

```
# Create model r8 removing as.factor(time):treatment
```

```
``{r}
```

```
r8 <- lmer(richness ~ treatment + as.factor(time)+ category + (1 | child), data= Data)
```

```
summary(r8)
```

```
...
```

```
# Compare model r7 and r8
```

```
``{r}
```

```
anova(r7,r8,test="Chisq")
```

```
...
```

```
# r8 is not significantly different to r7 so retain r8 (p > 0.05)
```

```
# Create model r9 removing as.factor(time)
```

```
``{r}
```

```
r9 <- lmer(richness ~ treatment + category + (1 | child), data= Data)
```

```
summary(r9)
```

```
...
```

```
# Compare model r8 and r9
```

```
``{r}
```

```
anova(r8,r9,test="Chisq")
```

```
...
```

```
# r9 is not significantly different to r8 so retain r8 (p > 0.05)
```

```
# r9 = r3 therefore r5 is the best fit model here
```

```
# r5 <- lmer(richness ~ treatment + (1 | child), data = Data) is the best fit model here.
```

```

# Check the residuals of the model r5 are normally distributed
```{r}
hist(residuals(r5))
...

# Compare the residuals with the fitted values
```{r}
plot(r5,type=c("p","smooth"))
...

# Perform a qqnorm plot to evaluate the assumption of the normality of the residuals
```{r}
residuals_richness =simulateResiduals(r5)
...

```{r}
testUniformity(simulationOutput = residuals_richness)
...

# Check the assumption of equal variance
```{r}
plot(r5, sqrt(abs(resid(.)))~fitted(.), type = c("p", "smooth"), ylab= expression (sqrt(abs(resid))))
...

# time (continuous or as a factor)and category are not important model components for species
richness diversity prediction

####

# Simpson Model Code

# Create a null model with just children as a random effect

```

```

``{r}

p0 <- lmer(simpson ~ 1 + (1 | child), data = Data)

summary(p0)

...

# Now create full model s1 using continuous time

``{r}

p1 <- lmer(simpson ~ treatment + time + category + treatment:time + treatment:category +
(1 | child), data = Data)

summary(p1)

...

# Compare p0 and p1:

``{r}

anova(p0, p1, test = "Chisq")

...

# p1 is not significantly different to p0 so retain p0 (p > 0.05)

# None of the model components are significant predictors of simpson diversity, double check by
backward elimination. p0 best fit model.

# Create model p2 removing treatment:category

``{r}

p2 <- lmer(simpson ~ treatment + time + category + treatment:time + (1 | child), data = Data)

summary(p2)

...

# Compare model p2 with model p0

``{r}

anova (p0,p2, test = "Chisq")

...

# p2 is significantly different to p0 so retain p0 (p < 0.05)
# p = 0.04884 on balance point of significance

# Create model p3 removing treatment:time

```

```

``{r}
p3 <- lmer(simpson ~ treatment + time + category + (1 | child), data = Data)
summary(p3)
...

# Compare model p3 with p2
``{r}
anova(p2,p3,test="Chisq")
...

# p3 is not significantly different to p2 so retain p3 (p > 0.05)

# Create model p4 removing category
``{r}
p4 <- lmer(simpson ~ treatment + time + (1 | child), data = Data)
summary(p4)
...

# Compare model p3 and p4
``{r}
anova(p3,p4,test="Chisq")
...

# p4 is not significantly different to p3 so retain p4 (p > 0.05)

# Create model p5 removing time
``{r}
p5 <- lmer(simpson ~ treatment + (1 | child), data = Data)
summary(p5)
...

# Compare model p4 and p5
``{r}
anova(p4,p5,test="Chisq")
...

```

```
# p5 is not significantly different to p4 so retain p5 (p > 0.05)
```

```
# Compare p5 to the null model
```

```
``{r}
```

```
anova(p0,p5,test="Chisq")
```

```
...
```

```
# p5 is not significantly different to p0 so retain p0 (p > 0.05)
```

```
# Therefore p0 is considered the best fit model here.
```

```
``{r}
```

```
anova(p0,p2,test="Chisq")
```

```
...
```

```
``{r}
```

```
anova(p0,p3,test="Chisq")
```

```
...
```

```
``{r}
```

```
anova(p0,p4,test="Chisq")
```

```
...
```

```
# Whilst models p2, p3 and p4 are statistically significant (assuming significant is p < 0.05) when compared to then null model, all p values here are very close to p = 0.05 suggesting all predictors here are borderline for significance and not important in the context of the paper questions.
```

```
# Now create full model p6 using as.factor(time)
```

```
``{r}
```

```
p6 <- lmer(simpson ~ treatment + as.factor(time) + category + as.factor(time):treatment + treatment:category + (1|child), data= Data)
```

```
summary(p6)
```

```
...
```

```
# Compare model p5 and p6
```

```
``{r}
```

```
anova(p0,p6,test="Chisq")
```

```
...
```

```
# p6 is not significantly different to p0 so retain p0 (p > 0.05)
```

```
#Create model p7 removing treatment:category
```

```
``{r}
```

```
p7 <- lmer(simpson ~ treatment + as.factor(time)+ category + as.factor(time):treatment + (1|child),  
data= Data)
```

```
summary(p7)
```

```
...
```

```
# Compare model p0 and p7
```

```
``{r}
```

```
anova(p0,p7,test="Chisq")
```

```
...
```

```
# p7 is not significantly different to p0 so retain p0 ( $p > 0.05$ )
```

```
# Create model p8 removing as.factor(time):treatment
```

```
``{r}
```

```
p8 <- lmer(simpson ~ treatment + as.factor(time)+ category + (1|child), data= Data)
```

```
summary(p8)
```

```
...
```

```
# Compare model p0 and p8
```

```
``{r}
```

```
anova(p0,p8,test="Chisq")
```

```
...
```

```
# p8 is not significantly different to p0 so retain p0 ( $p > 0.05$ )
```

```
# Create model p9 removing as.factor(time)
```

```
``{r}
```

```
p9 <- lmer(simpson ~ treatment + category + (1|child), data= Data)
```

```
summary(p9)
```



```

...

# Compare model p0 and p9
```{r}
anova(p0,p9,test="Chisq")
...

# p9 is not significantly different to p0 so retain p0 (p > 0.05)

# p0 <- lmer(simpson ~ 1 + (1|child), data = Data) is the best fit model here.

# Check the residuals of the model p0 are normally distributed
```{r}
hist(residuals(p0))
...

# Compare the residuals with the fitted values
```{r}
plot(p0,type=c("p","smooth"))
...

# Perform a qqnorm plot to evaluate the assumption of the normality of the residuals
```{r}
residuals_simpson =simulateResiduals(p0)
...

```{r}
testUniformity(simulationOutput = residuals_simpson)
...

# Check the assumption of equal variance
```{r}
plot(p0, sqrt(abs(resid(.)))~fitted(.), type = c("p", "smooth"), ylab= expression (sqrt(abs(resid))))
...

```

# time (continuous or as a factor), category and treatment are not important model components for simpson diversity prediction

####
