# Supplementary material for: The impact of storage conditions on human stool 16S rRNA microbiome composition and diversity
Source: PeerJ. 2019 Dec 2;7:e8133. doi: 10.7717/peerj.8133 (PMC6894433; doi:10.7717/peerj.8133)
Supplement: Supplemental Information 9 — Raw stool samples were compared against ethanol samples and RNAlater samples (C vs. E vs. R); ethanol samples were compared with raw stool samples only (C vs. E), and RNAlater samples were compared with raw stool samples only (C vs. R). [file peerj-07-8133-s009.xlsx]

## Sheet: Sheet1
number	taxonomy	preservation_method	LDA (log10)	p-value	child
1	Bacteria.Proteobacteria.Gammaproteobacteria.Pseudomonadales	C	2.14922	0.00955582	All
2	Bacteria.Firmicutes.Clostridia.Clostridiales.Eubacteriaceae	C	3.35582	0.009406	C
3	Bacteria.Firmicutes.Clostridia.Clostridiales.Eubacteriaceae.Anaerofustis	C	3.36898	0.009406	C
4	Bacteria.Firmicutes.Bacilli.Lactobacillales.Streptococcaceae.Other	C	2.02462	0.00923909	All
5	Bacteria.Firmicutes.Clostridia.Clostridiales.Peptostreptococcaceae.	C	3.2248	0.00815063	All
6	Bacteria.Fusobacteria	C	3.20136	0.0080903	B
7	Bacteria.Fusobacteria.Fusobacteriia	C	3.20136	0.0080903	B
8	Bacteria.Fusobacteria.Fusobacteriia.Fusobacteriales	C	3.20136	0.0080903	B
9	Bacteria.Fusobacteria.Fusobacteriia.Fusobacteriales.Fusobacteriaceae	C	3.20136	0.0080903	B
10	Bacteria.Actinobacteria.Coriobacteriia.Coriobacteriales.Coriobacteriaceae.Other	C	3.57427	0.00758773	C
11	Bacteria.Firmicutes.Bacilli.Lactobacillales.Streptococcaceae.Lactococcus	C	2.66038	0.00753811	A
12	Bacteria.Firmicutes.Clostridia.Clostridiales.Peptostreptococcaceae	C	3.01375	0.00700308	All
13	Bacteria.Proteobacteria.Deltaproteobacteria.Desulfovibrionales.Desulfovibrionaceae.Desulfovibrio	C	3.37339	0.00686258	B
14	Bacteria.Fusobacteria.Fusobacteriia.Fusobacteriales.Fusobacteriaceae.Cetobacterium	C	3.17382	0.00633275	B
15	Bacteria.Actinobacteria.Actinobacteria.Actinomycetales.Corynebacteriaceae	C	3.1282	0.00617014	A
16	Bacteria.Actinobacteria.Actinobacteria.Actinomycetales.Corynebacteriaceae.Corynebacterium	C	3.13486	0.00617014	A
17	Bacteria.Firmicutes.Clostridia.Clostridiales.Clostridiaceae.SMB53	C	3.40308	0.0061165	C
18	Bacteria.Firmicutes.Clostridia.Clostridiales.Dehalobacteriaceae.	C	2.73007	0.00595008	All
19	Bacteria.Bacteroidetes.Bacteroidia.Bacteroidales._Odoribacteraceae_.Butyricimonas	C	2.46327	0.00568218	A
20	Bacteria.Firmicutes.Bacilli.Lactobacillales.Other	C	2.86041	0.00567417	All
21	Bacteria.Firmicutes.Bacilli.Lactobacillales.Other.Other	C	2.84704	0.00567417	All
22	Bacteria.Firmicutes.Clostridia.Clostridiales.Dehalobacteriaceae.Dehalobacterium	C	2.4107	0.00530674	All
23	Bacteria.Bacteroidetes.Bacteroidia.Bacteroidales._Odoribacteraceae_.Butyricimonas	C	2.1089	0.00505761	All
24	Bacteria.Bacteroidetes.Bacteroidia.Bacteroidales._Odoribacteraceae_.Butyricimonas	C	2.98816	0.00505559	B
25	Bacteria.Proteobacteria.Gammaproteobacteria.Aeromonadales.Succinivibrionaceae.Succinivibrio	C	4.4683	0.00464024	B
26	Bacteria.Proteobacteria.Gammaproteobacteria.Enterobacteriales.Enterobacteriaceae.Other	C	3.25825	0.00451779	C
27	Bacteria.Actinobacteria.Actinobacteria.Actinomycetales.Actinomycetaceae	C	2.64005	0.00440708	A
28	Bacteria.Firmicutes.Clostridia.Clostridiales.Veillonellaceae.Dialister	C	3.0802	0.00435891	All
29	Bacteria.Firmicutes.Erysipelotrichi	C	3.57037	0.00424713	C
30	Bacteria.Firmicutes.Erysipelotrichi.Erysipelotrichales	C	3.57037	0.00424713	C
31	Bacteria.Firmicutes.Erysipelotrichi.Erysipelotrichales.Erysipelotrichaceae	C	3.57037	0.00424713	C
32	Bacteria.Firmicutes.Clostridia.Clostridiales._Tissierellaceae_	C	2.44658	0.00424618	All
33	Bacteria.Proteobacteria.Gammaproteobacteria.Enterobacteriales	C	3.06208	0.00397601	B
34	Bacteria.Proteobacteria.Gammaproteobacteria.Enterobacteriales.Enterobacteriaceae	C	3.06208	0.00397601	B
35	Bacteria.Synergistetes	C	2.85768	0.00393338	C
36	Bacteria.Synergistetes.Synergistia	C	2.85708	0.00393338	C
37	Bacteria.Synergistetes.Synergistia.Synergistales	C	2.86002	0.00393338	C
38	Bacteria.Synergistetes.Synergistia.Synergistales.Synergistaceae	C	2.85629	0.00393338	C
39	Bacteria.Synergistetes.Synergistia.Synergistales.Synergistaceae.Synergistes	C	2.86205	0.00393338	C
40	Bacteria.Firmicutes.Clostridia.Clostridiales._Tissierellaceae_.Parvimonas	C	2.52429	0.00389179	All
41	Bacteria.Firmicutes.Bacilli.Lactobacillales.Streptococcaceae.Streptococcus	C	2.56707	0.00375183	C
42	Bacteria.Firmicutes.Clostridia.Clostridiales.Lachnospiraceae.Blautia	C	3.19121	0.00365833	A
43	Bacteria.Bacteroidetes.Bacteroidia.Bacteroidales.Rikenellaceae	C	2.94251	0.0029818	B
44	Bacteria.Bacteroidetes.Bacteroidia.Bacteroidales.Rikenellaceae.	C	2.94251	0.0029818	B
45	Bacteria.Bacteroidetes.Bacteroidia.Bacteroidales._Odoribacteraceae_	C	3.03559	0.00281931	B
46	Bacteria.Firmicutes.Clostridia.Clostridiales.Veillonellaceae	C	3.18559	0.00280504	All
47	Bacteria.Firmicutes.Clostridia.Clostridiales.Dehalobacteriaceae.Dehalobacterium	C	3.05158	0.00254993	C
48	Bacteria.Proteobacteria.Gammaproteobacteria.Pasteurellales	C	3.02753	0.00249614	B
49	Bacteria.Proteobacteria.Gammaproteobacteria.Pasteurellales.Pasteurellaceae	C	3.02753	0.00249614	B
50	Bacteria.Firmicutes.Erysipelotrichi.Erysipelotrichales.Erysipelotrichaceae.p_75_a5	C	3.51407	0.00228811	B
51	Bacteria.Actinobacteria.Coriobacteriia.Coriobacteriales.Coriobacteriaceae.Slackia	C	2.83032	0.00226888	C
52	Bacteria.Bacteroidetes.Bacteroidia.Bacteroidales.	C	3.87359	0.00194297	C
53	Bacteria.Bacteroidetes.Bacteroidia.Bacteroidales..	C	3.87359	0.00194297	C
54	Bacteria.Proteobacteria.Gammaproteobacteria.Enterobacteriales.Enterobacteriaceae.	C	3.0763	0.00187655	B
55	Bacteria.Proteobacteria.Gammaproteobacteria.Enterobacteriales.Enterobacteriaceae.Erwinia	C	3.00158	0.00159207	All
56	Bacteria.Bacteroidetes.Bacteroidia.Bacteroidales.Bacteroidaceae	C	3.50155	0.00158233	All
57	Bacteria.Bacteroidetes.Bacteroidia.Bacteroidales.Bacteroidaceae.Bacteroides	C	3.50155	0.00158233	All
58	Bacteria.Firmicutes.Clostridia.Clostridiales.	C	3.91756	0.00155169	C
59	Bacteria.Firmicutes.Clostridia.Clostridiales..	C	3.91756	0.00155169	C
60	Bacteria.Firmicutes.Clostridia.Clostridiales.Clostridiaceae.SMB53	C	3.16105	0.00149259	B
61	Bacteria.Firmicutes.Clostridia.Clostridiales.Clostridiaceae.Clostridium	C	3.21879	0.00141675	B
62	Bacteria.Proteobacteria.Alphaproteobacteria.	C	4.46025	0.00141472	B
63	Bacteria.Proteobacteria.Alphaproteobacteria..	C	4.46025	0.00141472	B
64	Bacteria.Proteobacteria.Alphaproteobacteria...	C	4.46025	0.00141472	B
65	Bacteria.Firmicutes.Bacilli.Lactobacillales.Streptococcaceae	C	2.59392	0.00137571	C
66	Bacteria.Firmicutes.Bacilli.Lactobacillales.Enterococcaceae.Other	C	2.5194	0.00127796	All
67	Bacteria	C	3.4428	0.00123974	A
68	Bacteria.Firmicutes.Clostridia.Clostridiales.Dehalobacteriaceae	C	2.21601	0.00121567	All
69	Bacteria.Bacteroidetes.Bacteroidia.Bacteroidales.Porphyromonadaceae.Porphyromonas	C	2.85123	0.00121292	All
70	Bacteria.Proteobacteria.Betaproteobacteria.Burkholderiales.Oxalobacteraceae.Oxalobacter	C	2.81646	0.00111418	C
71	Bacteria.Proteobacteria.Alphaproteobacteria	C	4.45848	0.00106709	B
72	Bacteria.Proteobacteria.Gammaproteobacteria.Pseudomonadales.Pseudomonadaceae	C	3.46795	0.00104207	C
73	Bacteria.Proteobacteria.Gammaproteobacteria.Pseudomonadales.Pseudomonadaceae.Pseudomonas	C	3.47352	0.00104207	C
74	Bacteria.Firmicutes.Bacilli.Lactobacillales	C	2.59841	0.00104158	C
75	Bacteria.Tenericutes.Mollicutes.RF39	C	3.58912	0.00101593	B
76	Bacteria.Tenericutes.Mollicutes.RF39.	C	3.58912	0.00101593	B
77	Bacteria.Tenericutes.Mollicutes.RF39..	C	3.58912	0.00101593	B
78	Bacteria.Proteobacteria.Betaproteobacteria.Burkholderiales.Oxalobacteraceae	C	2.82747	0.000996521	C
79	Bacteria.Actinobacteria.Actinobacteria.Actinomycetales.Actinomycetaceae.Other	C	3.10841	0.000968503	A
80	Bacteria.Firmicutes.Bacilli.Lactobacillales.Streptococcaceae.Other	C	3.13686	0.000960313	C
81	Bacteria.Firmicutes.Clostridia.Clostridiales.Lachnospiraceae.Dorea	C	2.90244	0.000943958	A
82	Bacteria.Spirochaetes._Brachyspirae_	C	3.12691	0.000929649	C
83	Bacteria.Spirochaetes._Brachyspirae_._Brachyspirales_	C	3.12691	0.000929649	C
84	Bacteria.Spirochaetes._Brachyspirae_._Brachyspirales_.Brachyspiraceae	C	3.12691	0.000929649	C
85	Bacteria.Spirochaetes._Brachyspirae_._Brachyspirales_.Brachyspiraceae.Brachyspira	C	3.12691	0.000929649	C
86	Bacteria.Bacteroidetes.Bacteroidia.Bacteroidales.Porphyromonadaceae.Porphyromonas	C	2.80943	0.000835356	A
87	Bacteria.Firmicutes.Bacilli.Lactobacillales.Other	C	3.24377	0.000820278	A
88	Bacteria.Firmicutes.Bacilli.Lactobacillales.Other.Other	C	3.24506	0.000820278	A
89	Bacteria.Proteobacteria.Gammaproteobacteria.Pasteurellales.Pasteurellaceae.Haemophilus	C	3.0015	0.000796756	B
90	Bacteria.Actinobacteria.Actinobacteria.Actinomycetales.Actinomycetaceae.Other	C	3.25082	0.000739621	All
91	Bacteria.Firmicutes.Erysipelotrichi.Erysipelotrichales.Erysipelotrichaceae.Other	C	2.73936	0.000736563	C
92	Bacteria.Firmicutes.Clostridia.Clostridiales.Clostridiaceae.	C	3.51941	0.000640074	B
93	Bacteria.Bacteroidetes.Bacteroidia.Bacteroidales.Bacteroidaceae	C	3.87672	0.000588263	A
94	Bacteria.Bacteroidetes.Bacteroidia.Bacteroidales.Bacteroidaceae.Bacteroides	C	3.87672	0.000588263	A
95	Bacteria.Firmicutes.Clostridia.Clostridiales.Veillonellaceae.Dialister	C	3.13156	0.000552718	C
96	Bacteria.Bacteroidetes.Bacteroidia.Bacteroidales.Other	C	2.87253	0.000481529	A
97	Bacteria.Bacteroidetes.Bacteroidia.Bacteroidales.Other.Other	C	2.87253	0.000481529	A
98	Bacteria.Firmicutes.Clostridia.Clostridiales._Mogibacteriaceae_	C	2.57331	0.000459292	B
99	Bacteria.Firmicutes.Clostridia.Clostridiales._Mogibacteriaceae_.	C	2.57331	0.000459292	B
100	Bacteria.Actinobacteria.Coriobacteriia.Coriobacteriales.Coriobacteriaceae.Slackia	C	2.32801	0.000458757	All
101	Bacteria.Bacteroidetes.Bacteroidia.Bacteroidales.Rikenellaceae	C	2.87294	0.000431982	A
102	Bacteria.Bacteroidetes.Bacteroidia.Bacteroidales.Rikenellaceae.	C	2.87294	0.000431982	A
103	Bacteria.Firmicutes.Clostridia.Clostridiales.Lachnospiraceae.Coprococcus	C	2.98126	0.000373827	All
104	Bacteria.Firmicutes.Clostridia.Clostridiales.Ruminococcaceae.Oscillospira	C	2.82496	0.00037206	B
105	Bacteria.Firmicutes.Clostridia.Clostridiales.Clostridiaceae	C	3.84732	0.000337784	B
106	Bacteria.Firmicutes.Bacilli.Lactobacillales.Enterococcaceae.Other	C	2.78044	0.000296391	A
107	Bacteria.Firmicutes.Erysipelotrichi.Erysipelotrichales.Erysipelotrichaceae.Other	C	2.95643	0.000277743	B
108	Bacteria.Firmicutes.Clostridia.Clostridiales.Ruminococcaceae.Oscillospira	C	2.81159	0.000253869	All
109	Bacteria.Proteobacteria.Gammaproteobacteria.Pseudomonadales	C	3.51109	0.00024571	C
110	Bacteria.Actinobacteria.Coriobacteriia.Coriobacteriales.Coriobacteriaceae.Slackia	C	2.60679	0.000235845	A
111	Bacteria.Firmicutes.Clostridia.Clostridiales.Lachnospiraceae.Anaerostipes	C	2.8246	0.00022586	B
112	Bacteria.Firmicutes.Bacilli	C	3.03207	0.000224867	B
113	Bacteria.Bacteroidetes.Bacteroidia.Bacteroidales.Porphyromonadaceae	C	3.60782	0.000206537	All
114	Bacteria.Bacteroidetes.Bacteroidia.Bacteroidales.Porphyromonadaceae.Parabacteroides	C	3.60714	0.000206537	All
115	Bacteria.Firmicutes.Clostridia.Clostridiales.Dehalobacteriaceae.	C	3.38415	0.000204248	C
116	Bacteria.Tenericutes.Mollicutes.RF39	C	2.63111	0.000183249	C
117	Bacteria.Tenericutes.Mollicutes.RF39.	C	2.63111	0.000183249	C
118	Bacteria.Tenericutes.Mollicutes.RF39..	C	2.63111	0.000183249	C
119	Bacteria	C	4.1447	0.000178138	C
120	Bacteria.Firmicutes.Clostridia.Clostridiales._Mogibacteriaceae_	C	2.59478	0.000172814	A
121	Bacteria.Firmicutes.Clostridia.Clostridiales._Mogibacteriaceae_.	C	2.59478	0.000172814	A
122	Bacteria.Proteobacteria.Betaproteobacteria.Burkholderiales.Comamonadaceae	C	2.83483	0.000160465	A
123	Bacteria.Proteobacteria.Betaproteobacteria.Burkholderiales.Comamonadaceae.Comamonas	C	2.83483	0.000160465	A
124	Bacteria.Actinobacteria.Coriobacteriia.Coriobacteriales.Coriobacteriaceae.Collinsella	C	3.27283	0.000148384	B
125	Bacteria.Firmicutes.Bacilli.Lactobacillales.Lactobacillaceae	C	2.42967	0.000146976	A
126	Bacteria.Firmicutes.Bacilli.Lactobacillales.Lactobacillaceae.Lactobacillus	C	2.42967	0.000146976	A
127	Bacteria.Firmicutes.Clostridia.Clostridiales.Veillonellaceae.Veillonella	C	2.51736	0.000144125	A
128	Bacteria.Actinobacteria.Coriobacteriia.Coriobacteriales.Coriobacteriaceae.Other	C	3.25739	0.000141496	All
129	Bacteria.Firmicutes.Bacilli.Turicibacterales	C	2.25327	0.000136271	A
130	Bacteria.Firmicutes.Bacilli.Turicibacterales.Turicibacteraceae	C	2.25327	0.000136271	A
131	Bacteria.Firmicutes.Bacilli.Turicibacterales.Turicibacteraceae.Turicibacter	C	2.25327	0.000136271	A
132	Bacteria.Firmicutes.Bacilli.Turicibacterales	C	2.81301	0.000124478	B
133	Bacteria.Firmicutes.Bacilli.Turicibacterales.Turicibacteraceae	C	2.81301	0.000124478	B
134	Bacteria.Firmicutes.Bacilli.Turicibacterales.Turicibacteraceae.Turicibacter	C	2.81301	0.000124478	B
135	Bacteria.Firmicutes.Clostridia.Clostridiales.Christensenellaceae	C	3.06106	0.00012234	C
136	Bacteria.Firmicutes.Clostridia.Clostridiales.Christensenellaceae.	C	3.06106	0.00012234	C
137	Bacteria.Firmicutes.Clostridia.Clostridiales.Lachnospiraceae.Roseburia	C	2.81642	0.000117189	B
138	Bacteria.Firmicutes.Erysipelotrichi.Erysipelotrichales.Erysipelotrichaceae.p_75_a5	C	2.66961	0.000116877	All
139	Bacteria.Firmicutes.Clostridia.Clostridiales.Dehalobacteriaceae	C	2.98147	0.000106452	C
140	Bacteria.Proteobacteria.Gammaproteobacteria.Enterobacteriales.Enterobacteriaceae.Erwinia	C	3.10837	0.000101553	A
141	Bacteria.Tenericutes.Mollicutes.RF39	C	2.90085	9.79122e-05	A
142	Bacteria.Tenericutes.Mollicutes.RF39.	C	2.90085	9.79122e-05	A
143	Bacteria.Tenericutes.Mollicutes.RF39..	C	2.90085	9.79122e-05	A
144	Bacteria.Firmicutes.Clostridia.Clostridiales.Lachnospiraceae.Other	C	3.78374	9.68e-05	B
145	Bacteria.Firmicutes.Bacilli.Lactobacillales.Streptococcaceae.Other	C	2.50077	9.15079e-05	A
146	Bacteria.Firmicutes.Erysipelotrichi.Erysipelotrichales.Erysipelotrichaceae.p_75_a5	C	2.56149	9.15079e-05	A
147	Bacteria.Firmicutes.Clostridia.Clostridiales.Lachnospiraceae	C	4.37837	8.83039e-05	C
148	Bacteria.Firmicutes.Clostridia.Clostridiales.Clostridiaceae.SMB53	C	2.49987	8.48491e-05	All
149	Bacteria.Firmicutes.Clostridia.Clostridiales.Ruminococcaceae.Oscillospira	C	3.07831	8.11019e-05	A
150	Bacteria.Firmicutes.Clostridia.Clostridiales.Other	C	3.4666	7.49e-05	B
151	Bacteria.Firmicutes.Clostridia.Clostridiales.Other.Other	C	3.4666	7.49e-05	B
152	Bacteria.Bacteroidetes.Bacteroidia.Bacteroidales.Bacteroidaceae	C	2.93363	6.95e-05	B
153	Bacteria.Bacteroidetes.Bacteroidia.Bacteroidales.Bacteroidaceae.Bacteroides	C	2.93363	6.95e-05	B
154	Bacteria.Firmicutes.Clostridia.Clostridiales.Clostridiaceae.Other	C	3.3186	6.2e-05	B
155	Bacteria.Firmicutes.Clostridia.Clostridiales.Lachnospiraceae.Coprococcus	C	3.0552	6.09578e-05	C
156	Bacteria.Firmicutes.Erysipelotrichi.Erysipelotrichales.Erysipelotrichaceae.Bulleidia	C	2.75565	5.34751e-05	C
157	Bacteria.Firmicutes.Clostridia.Clostridiales.Ruminococcaceae.Ruminococcus	C	3.39135	5.02e-05	B
158	Bacteria.Firmicutes.Clostridia.Clostridiales.Lachnospiraceae.Other	C	3.8501	4.98767e-05	C
159	Bacteria.Firmicutes.Bacilli.Lactobacillales.Leuconostocaceae	C	2.57547	4.94163e-05	A
160	Bacteria.Proteobacteria.Betaproteobacteria.Burkholderiales.Oxalobacteraceae.Oxalobacter	C	3.00235	4.86186e-05	A
161	Bacteria.Firmicutes.Bacilli.Lactobacillales.Enterococcaceae	C	3.60412	4.84365e-05	A
162	Bacteria.Proteobacteria.Betaproteobacteria.Burkholderiales.Oxalobacteraceae	C	3.00224	4.84365e-05	A
163	Bacteria.Firmicutes.Bacilli.Lactobacillales.Enterococcaceae.Enterococcus	C	3.60204	4.80743e-05	A
164	Bacteria.Firmicutes.Clostridia.Clostridiales.Ruminococcaceae.Ruminococcus	C	3.85775	4.79017e-05	C
165	Bacteria.Firmicutes.Erysipelotrichi.Erysipelotrichales.Erysipelotrichaceae.p_75_a5	C	3.06019	4.70288e-05	C
166	Bacteria.Firmicutes.Clostridia.Clostridiales.Clostridiaceae.	C	3.02714	4.3384e-05	A
167	Bacteria.Firmicutes.Clostridia.Clostridiales.Clostridiaceae.	C	3.18709	4.23744e-05	C
168	Bacteria.Firmicutes.Bacilli	C	3.57527	4.20929e-05	All
169	Bacteria.Actinobacteria	C	3.76823	4.10632e-05	A
170	Bacteria.Proteobacteria.Gammaproteobacteria.Enterobacteriales	C	3.18983	3.93962e-05	All
171	Bacteria.Proteobacteria.Gammaproteobacteria.Enterobacteriales.Enterobacteriaceae	C	3.18983	3.93962e-05	All
172	Bacteria.Actinobacteria.Coriobacteriia.Coriobacteriales.Coriobacteriaceae.Slackia	C	2.81821	3.91e-05	B
173	Bacteria.Firmicutes.Clostridia.Clostridiales.Clostridiaceae.Other	C	2.63007	3.86189e-05	A
174	Bacteria.Firmicutes.Clostridia.Clostridiales.Veillonellaceae.Dialister	C	3.37408	3.72e-05	B
175	Bacteria.Actinobacteria	C	3.55846	3.69e-05	B
176	Bacteria.Actinobacteria.Coriobacteriia	C	3.56248	3.69e-05	B
177	Bacteria.Actinobacteria.Coriobacteriia.Coriobacteriales	C	3.56248	3.69e-05	B
178	Bacteria.Actinobacteria.Coriobacteriia.Coriobacteriales.Coriobacteriaceae	C	3.56248	3.69e-05	B
179	Bacteria.Actinobacteria.Coriobacteriia.Coriobacteriales.Coriobacteriaceae.	C	3.12214	3.41e-05	B
180	Bacteria.Actinobacteria.Coriobacteriia	C	3.76886	3.27833e-05	A
181	Bacteria.Actinobacteria.Coriobacteriia.Coriobacteriales	C	3.76886	3.27833e-05	A
182	Bacteria.Actinobacteria.Coriobacteriia.Coriobacteriales.Coriobacteriaceae	C	3.76886	3.27833e-05	A
183	Bacteria.Actinobacteria.Coriobacteriia.Coriobacteriales.Coriobacteriaceae.	C	3.32382	3.27833e-05	A
184	Bacteria.Actinobacteria.Coriobacteriia.Coriobacteriales.Coriobacteriaceae.Collinsella	C	3.57006	3.27833e-05	A
185	Bacteria.Firmicutes.Bacilli.Lactobacillales.Leuconostocaceae.Other	C	2.54824	2.98646e-05	A
186	Bacteria.Firmicutes.Clostridia.Clostridiales._Tissierellaceae_	C	2.86844	2.97549e-05	C
187	Bacteria.Firmicutes.Clostridia.Clostridiales._Tissierellaceae_.Parvimonas	C	3.02479	2.97549e-05	C
188	Bacteria.Bacteroidetes	C	5.00521	2.92e-05	B
189	Bacteria.Bacteroidetes.Bacteroidia	C	5.0052	2.92e-05	B
190	Bacteria.Bacteroidetes.Bacteroidia.Bacteroidales	C	5.0052	2.92e-05	B
191	Bacteria.Proteobacteria.Gammaproteobacteria.Other	C	2.43559	2.91825e-05	A
192	Bacteria.Proteobacteria.Gammaproteobacteria.Other.Other	C	2.43559	2.91825e-05	A
193	Bacteria.Proteobacteria.Gammaproteobacteria.Other.Other.Other	C	2.43559	2.91825e-05	A
194	Bacteria.Firmicutes.Clostridia.Clostridiales.Clostridiaceae.Other	C	2.90812	2.47069e-05	C
195	Bacteria.Firmicutes.Clostridia.Clostridiales.Veillonellaceae	C	3.56703	2.42e-05	B
196	Bacteria.Bacteroidetes.Bacteroidia.Bacteroidales.Porphyromonadaceae	C	3.41317	2.38288e-05	A
197	Bacteria.Bacteroidetes.Bacteroidia.Bacteroidales.Porphyromonadaceae.Parabacteroides	C	3.41153	2.38288e-05	A
198	Bacteria.Firmicutes.Clostridia.Clostridiales.Lachnospiraceae.Dorea	C	3.00595	2.35048e-05	C
199	Bacteria.Firmicutes.Bacilli.Turicibacterales	C	2.85446	2.22456e-05	C
200	Bacteria.Firmicutes.Bacilli.Turicibacterales.Turicibacteraceae	C	2.85446	2.22456e-05	C
201	Bacteria.Firmicutes.Bacilli.Turicibacterales.Turicibacteraceae.Turicibacter	C	2.85446	2.22456e-05	C
202	Bacteria.Firmicutes.Bacilli	C	2.96824	2.15236e-05	C
203	Bacteria.Proteobacteria.Gammaproteobacteria.Enterobacteriales.Enterobacteriaceae.Other	C	2.88354	2.04302e-05	A
204	Bacteria.Bacteroidetes.Bacteroidia.Bacteroidales.p_2534_18B5	C	2.74804	2.03456e-05	C
205	Bacteria.Bacteroidetes.Bacteroidia.Bacteroidales.p_2534_18B5.	C	2.74804	2.03456e-05	C
206	Bacteria.Bacteroidetes.Bacteroidia.Bacteroidales.Porphyromonadaceae	C	3.61328	1.94e-05	B
207	Bacteria.Bacteroidetes.Bacteroidia.Bacteroidales.Porphyromonadaceae.Parabacteroides	C	3.61333	1.94e-05	B
208	Bacteria.Bacteroidetes.Bacteroidia.Bacteroidales.Prevotellaceae	C	4.94396	1.68e-05	B
209	Bacteria.Bacteroidetes.Bacteroidia.Bacteroidales.Prevotellaceae.Prevotella	C	4.94396	1.68e-05	B
210	Bacteria.WPS_2	C	5.04873	1.25566e-05	C
211	Bacteria.WPS_2.	C	5.04873	1.25566e-05	C
212	Bacteria.WPS_2..	C	5.04873	1.25566e-05	C
213	Bacteria.WPS_2...	C	5.04873	1.25566e-05	C
214	Bacteria.WPS_2....	C	5.04873	1.25566e-05	C
215	Bacteria.Bacteroidetes.Bacteroidia.Bacteroidales.Other	C	3.85156	1.21e-05	B
216	Bacteria.Bacteroidetes.Bacteroidia.Bacteroidales.Other.Other	C	3.85156	1.21e-05	B
217	Bacteria.Firmicutes.Clostridia.Clostridiales.Lachnospiraceae.Dorea	C	2.8082	1.18365e-05	All
218	Bacteria.Proteobacteria.Gammaproteobacteria.Pseudomonadales	C	2.64007	1.17669e-05	A
219	Bacteria.Proteobacteria.Gammaproteobacteria.Pseudomonadales.Pseudomonadaceae	C	2.63743	9.50059e-06	A
220	Bacteria.Proteobacteria.Gammaproteobacteria.Pseudomonadales.Pseudomonadaceae.Pseudomonas	C	2.63743	9.50059e-06	A
221	Bacteria.Proteobacteria.Betaproteobacteria.Burkholderiales.Oxalobacteraceae	C	3.0732	7.77e-06	B
222	Bacteria.Bacteroidetes	C	5.07775	7.55649e-06	A
223	Bacteria.Bacteroidetes.Bacteroidia	C	5.07775	7.55649e-06	A
224	Bacteria.Bacteroidetes.Bacteroidia.Bacteroidales	C	5.07775	7.55649e-06	A
225	Bacteria.Bacteroidetes.Bacteroidia.Bacteroidales.Prevotellaceae	C	5.0474	7.55649e-06	A
226	Bacteria.Bacteroidetes.Bacteroidia.Bacteroidales.Prevotellaceae.Prevotella	C	5.0474	7.55649e-06	A
227	Bacteria.Firmicutes.Bacilli	C	3.9629	7.55649e-06	A
228	Bacteria.Firmicutes.Bacilli.Lactobacillales	C	3.93555	7.55649e-06	A
229	Bacteria.Firmicutes.Bacilli.Lactobacillales.Streptococcaceae	C	3.62588	7.55649e-06	A
230	Bacteria.Firmicutes.Bacilli.Lactobacillales.Streptococcaceae.Streptococcus	C	3.6042	7.55649e-06	A
231	Bacteria.Firmicutes.Erysipelotrichi.Erysipelotrichales.Erysipelotrichaceae._Eubacterium_	C	3.56731	7.55649e-06	A
232	Bacteria.Proteobacteria.Gammaproteobacteria.Enterobacteriales	C	3.62219	7.55649e-06	A
233	Bacteria.Proteobacteria.Gammaproteobacteria.Enterobacteriales.Enterobacteriaceae	C	3.62219	7.55649e-06	A
234	Bacteria.Proteobacteria.Gammaproteobacteria.Enterobacteriales.Enterobacteriaceae.	C	3.53888	7.55649e-06	A
235	Bacteria.Firmicutes.Erysipelotrichi.Erysipelotrichales.Erysipelotrichaceae._Eubacterium_	C	3.5289	6.89071e-06	C
236	Bacteria.Proteobacteria.Betaproteobacteria.Burkholderiales.Oxalobacteraceae.Oxalobacter	C	3.07573	6.31e-06	B
237	Bacteria.Actinobacteria.Coriobacteriia.Coriobacteriales.Coriobacteriaceae.	C	3.19303	5.8144e-06	C
238	Bacteria.Proteobacteria.Gammaproteobacteria.Enterobacteriales.Enterobacteriaceae.	C	3.10549	5.50598e-06	All
239	Bacteria.Firmicutes.Clostridia.Clostridiales.Lachnospiraceae._Ruminococcus_	C	2.97684	5.32284e-06	C
240	Bacteria.Proteobacteria.Gammaproteobacteria.Enterobacteriales	C	2.72127	5.30694e-06	C
241	Bacteria.Proteobacteria.Gammaproteobacteria.Enterobacteriales.Enterobacteriaceae	C	2.72127	5.30694e-06	C
242	Bacteria.Proteobacteria.Gammaproteobacteria.Enterobacteriales.Enterobacteriaceae.	C	2.68758	5.16561e-06	C
243	Bacteria.Actinobacteria	C	3.93912	4.06217e-06	C
244	Bacteria.Actinobacteria.Coriobacteriia	C	3.9392	4.06217e-06	C
245	Bacteria.Actinobacteria.Coriobacteriia.Coriobacteriales	C	3.9392	4.06217e-06	C
246	Bacteria.Actinobacteria.Coriobacteriia.Coriobacteriales.Coriobacteriaceae	C	3.9392	4.06217e-06	C
247	Bacteria.Actinobacteria.Coriobacteriia.Coriobacteriales.Coriobacteriaceae.Collinsella	C	3.85051	4.06217e-06	C
248	Bacteria.Firmicutes.Clostridia.Clostridiales._Mogibacteriaceae_	C	2.78896	4.06217e-06	C
249	Bacteria.Firmicutes.Clostridia.Clostridiales._Mogibacteriaceae_.	C	2.78896	4.06217e-06	C
250	Bacteria.Firmicutes.Clostridia.Clostridiales.Lachnospiraceae.Blautia	C	3.75453	4.06217e-06	C
251	Bacteria.Firmicutes.Erysipelotrichi.Erysipelotrichales.Erysipelotrichaceae._Eubacterium_	C	3.40193	8.37935e-07	All
252	Bacteria.Proteobacteria.Betaproteobacteria.Burkholderiales.Oxalobacteraceae.Oxalobacter	C	2.65978	4.16655e-07	All
253	Bacteria.Proteobacteria.Betaproteobacteria.Burkholderiales.Oxalobacteraceae	C	2.65692	3.85008e-07	All
254	Bacteria	C	3.79184	2.87414e-07	All
255	Bacteria.Firmicutes.Erysipelotrichi.Erysipelotrichales.Erysipelotrichaceae.Other	C	2.332	6.25496e-08	All
256	Bacteria.Firmicutes.Clostridia.Clostridiales._Mogibacteriaceae_	C	2.58065	4.50293e-08	All
257	Bacteria.Firmicutes.Clostridia.Clostridiales._Mogibacteriaceae_.	C	2.58065	4.50293e-08	All
258	Bacteria.Firmicutes.Clostridia.Clostridiales.Lachnospiraceae.Blautia	C	3.45542	1.28951e-08	All
259	Bacteria.Firmicutes.Clostridia.Clostridiales.Clostridiaceae.	C	3.28837	3.02339e-09	All
260	Bacteria.Firmicutes.Bacilli.Turicibacterales	C	2.6736	4.07877e-10	All
261	Bacteria.Firmicutes.Bacilli.Turicibacterales.Turicibacteraceae	C	2.6736	4.07877e-10	All
262	Bacteria.Firmicutes.Bacilli.Turicibacterales.Turicibacteraceae.Turicibacter	C	2.6736	4.07877e-10	All
263	Bacteria.Firmicutes.Clostridia.Clostridiales.Clostridiaceae.Other	C	3.0233	9.05109e-11	All
264	Bacteria.Bacteroidetes.Bacteroidia.Bacteroidales.Prevotellaceae	C	4.87404	3.08387e-11	All
265	Bacteria.Bacteroidetes.Bacteroidia.Bacteroidales.Prevotellaceae.Prevotella	C	4.87404	3.08387e-11	All
266	Bacteria.Bacteroidetes	C	4.94053	6.15019e-12	All
267	Bacteria.Bacteroidetes.Bacteroidia	C	4.94052	6.15019e-12	All
268	Bacteria.Bacteroidetes.Bacteroidia.Bacteroidales	C	4.94052	6.15019e-12	All
269	Bacteria.Actinobacteria.Coriobacteriia.Coriobacteriales.Coriobacteriaceae.	C	3.23246	2.94472e-13	All
270	Bacteria.Actinobacteria.Coriobacteriia.Coriobacteriales.Coriobacteriaceae.Collinsella	C	3.64145	1.7956e-13	All
271	Bacteria.Actinobacteria	C	3.79699	1.56937e-14	All
272	Bacteria.Actinobacteria.Coriobacteriia	C	3.79772	1.42149e-14	All
273	Bacteria.Actinobacteria.Coriobacteriia.Coriobacteriales	C	3.79772	1.42149e-14	All
274	Bacteria.Actinobacteria.Coriobacteriia.Coriobacteriales.Coriobacteriaceae	C	3.79772	1.42149e-14	All
275	Bacteria.Actinobacteria.Actinobacteria	E	2.93623	0.00335866	B
276	Bacteria.Actinobacteria.Actinobacteria.Actinomycetales	E	2.93623	0.00335866	B
277	Bacteria.Actinobacteria.Actinobacteria.Actinomycetales.Micrococcaceae.Rothia	E	2.59604	0.00684086	A
278	Bacteria.Bacteroidetes.Bacteroidia.Bacteroidales.	E	4.03155	0.000219473	B
279	Bacteria.Bacteroidetes.Bacteroidia.Bacteroidales..	E	4.03155	0.000219473	B
280	Bacteria.Bacteroidetes.Bacteroidia.Bacteroidales._Paraprevotellaceae_	E	3.69316	0.000385747	A
281	Bacteria.Bacteroidetes.Bacteroidia.Bacteroidales._Paraprevotellaceae_	E	3.70494	1.86199e-05	All
282	Bacteria.Bacteroidetes.Bacteroidia.Bacteroidales._Paraprevotellaceae_	E	3.33554	0.000165522	B
283	Bacteria.Bacteroidetes.Bacteroidia.Bacteroidales._Paraprevotellaceae_	E	3.8838	0.00209141	C
284	Bacteria.Bacteroidetes.Bacteroidia.Bacteroidales._Paraprevotellaceae_._Prevotella_	E	3.69316	0.000385747	A
285	Bacteria.Bacteroidetes.Bacteroidia.Bacteroidales._Paraprevotellaceae_._Prevotella_	E	3.70494	1.86199e-05	All
286	Bacteria.Bacteroidetes.Bacteroidia.Bacteroidales._Paraprevotellaceae_._Prevotella_	E	3.33554	0.000165522	B
287	Bacteria.Bacteroidetes.Bacteroidia.Bacteroidales._Paraprevotellaceae_._Prevotella_	E	3.8838	0.00209141	C
288	Bacteria.Bacteroidetes.Bacteroidia.Bacteroidales.Other	E	3.44244	0.00209141	C
289	Bacteria.Bacteroidetes.Bacteroidia.Bacteroidales.Other.Other	E	3.44244	0.00209141	C
290	Bacteria.Bacteroidetes.Bacteroidia.Bacteroidales.RF16	E	3.39065	0.00344469	C
291	Bacteria.Bacteroidetes.Bacteroidia.Bacteroidales.RF16.	E	3.39065	0.00344469	C
292	Bacteria.Cyanobacteria	E	4.03899	0.00132004	A
293	Bacteria.Cyanobacteria	E	4.05454	1.9115e-09	All
294	Bacteria.Cyanobacteria	E	3.81167	0.00447365	B
295	Bacteria.Cyanobacteria	E	4.23322	0.000169439	C
296	Bacteria.Cyanobacteria.4C0d_2	E	4.03869	0.00132004	A
297	Bacteria.Cyanobacteria.4C0d_2	E	4.05444	1.9115e-09	All
298	Bacteria.Cyanobacteria.4C0d_2	E	3.81163	0.00447365	B
299	Bacteria.Cyanobacteria.4C0d_2	E	4.23322	0.000169439	C
300	Bacteria.Cyanobacteria.4C0d_2.YS2	E	4.03869	0.00132004	A
301	Bacteria.Cyanobacteria.4C0d_2.YS2	E	4.05444	1.9115e-09	All
302	Bacteria.Cyanobacteria.4C0d_2.YS2	E	3.81163	0.00447365	B
303	Bacteria.Cyanobacteria.4C0d_2.YS2	E	4.23322	0.000169439	C
304	Bacteria.Cyanobacteria.4C0d_2.YS2.	E	4.03869	0.00132004	A
305	Bacteria.Cyanobacteria.4C0d_2.YS2.	E	4.05444	1.9115e-09	All
306	Bacteria.Cyanobacteria.4C0d_2.YS2.	E	3.81163	0.00447365	B
307	Bacteria.Cyanobacteria.4C0d_2.YS2.	E	4.23322	0.000169439	C
308	Bacteria.Cyanobacteria.4C0d_2.YS2..	E	4.03869	0.00132004	A
309	Bacteria.Cyanobacteria.4C0d_2.YS2..	E	4.05444	1.9115e-09	All
310	Bacteria.Cyanobacteria.4C0d_2.YS2..	E	3.81163	0.00447365	B
311	Bacteria.Cyanobacteria.4C0d_2.YS2..	E	4.23322	0.000169439	C
312	Bacteria.Elusimicrobia	E	3.9591	0.00102465	All
313	Bacteria.Elusimicrobia	E	4.05838	0.000219473	B
314	Bacteria.Elusimicrobia	E	4.16443	0.000169439	C
315	Bacteria.Elusimicrobia.Elusimicrobia	E	3.9591	0.00102465	All
316	Bacteria.Elusimicrobia.Elusimicrobia	E	4.05838	0.000219473	B
317	Bacteria.Elusimicrobia.Elusimicrobia	E	4.16443	0.000169439	C
318	Bacteria.Elusimicrobia.Elusimicrobia.Elusimicrobiales	E	3.9591	0.00102465	All
319	Bacteria.Elusimicrobia.Elusimicrobia.Elusimicrobiales	E	4.05838	0.000219473	B
320	Bacteria.Elusimicrobia.Elusimicrobia.Elusimicrobiales	E	4.16443	0.000169439	C
321	Bacteria.Elusimicrobia.Elusimicrobia.Elusimicrobiales.Elusimicrobiaceae	E	3.9591	0.00102465	All
322	Bacteria.Elusimicrobia.Elusimicrobia.Elusimicrobiales.Elusimicrobiaceae	E	4.05838	0.000219473	B
323	Bacteria.Elusimicrobia.Elusimicrobia.Elusimicrobiales.Elusimicrobiaceae	E	4.16443	0.000169439	C
324	Bacteria.Elusimicrobia.Elusimicrobia.Elusimicrobiales.Elusimicrobiaceae.	E	3.9591	0.00102465	All
325	Bacteria.Elusimicrobia.Elusimicrobia.Elusimicrobiales.Elusimicrobiaceae.	E	4.05838	0.000219473	B
326	Bacteria.Elusimicrobia.Elusimicrobia.Elusimicrobiales.Elusimicrobiaceae.	E	4.16443	0.000169439	C
327	Bacteria.Firmicutes.Clostridia	E	4.51317	0.00309602	A
328	Bacteria.Firmicutes.Clostridia.Clostridiales	E	4.51317	0.00309602	A
329	Bacteria.Firmicutes.Clostridia.Clostridiales.	E	4.13548	0.00052997	A
330	Bacteria.Firmicutes.Clostridia.Clostridiales.	E	3.83762	0.00692265	B
331	Bacteria.Firmicutes.Clostridia.Clostridiales..	E	4.13548	0.00052997	A
332	Bacteria.Firmicutes.Clostridia.Clostridiales..	E	3.83762	0.00692265	B
333	Bacteria.Firmicutes.Clostridia.Clostridiales.Christensenellaceae	E	2.41673	0.0040592	A
334	Bacteria.Firmicutes.Clostridia.Clostridiales.Christensenellaceae.	E	2.41673	0.0040592	A
335	Bacteria.Firmicutes.Clostridia.Clostridiales.Clostridiaceae.Clostridium	E	3.16334	0.000980366	A
336	Bacteria.Firmicutes.Clostridia.Clostridiales.Lachnospiraceae._Ruminococcus_	E	2.4851	0.0040592	A
337	Bacteria.Firmicutes.Clostridia.Clostridiales.Lachnospiraceae.Lachnospira	E	3.38133	0.00132004	A
338	Bacteria.Firmicutes.Clostridia.Clostridiales.Lachnospiraceae.Lachnospira	E	3.13983	0.00107899	B
339	Bacteria.Firmicutes.Clostridia.Clostridiales.Other	E	4.00663	0.000722671	C
340	Bacteria.Firmicutes.Clostridia.Clostridiales.Other.Other	E	4.00663	0.000722671	C
341	Bacteria.Firmicutes.Clostridia.Clostridiales.Peptococcaceae	E	2.79037	0.000383471	A
342	Bacteria.Firmicutes.Clostridia.Clostridiales.Peptococcaceae.	E	2.78619	0.000376699	A
343	Bacteria.Firmicutes.Clostridia.Clostridiales.Ruminococcaceae	E	4.27191	0.00879354	A
344	Bacteria.Firmicutes.Clostridia.Clostridiales.Ruminococcaceae.	E	4.1239	0.00528696	A
345	Bacteria.Firmicutes.Clostridia.Clostridiales.Ruminococcaceae.Ruminococcus	E	3.51303	0.00132004	A
346	Bacteria.Firmicutes.Erysipelotrichi.Erysipelotrichales.Erysipelotrichaceae.	E	3.06513	0.00879354	A
347	Bacteria.Firmicutes.Erysipelotrichi.Erysipelotrichales.Erysipelotrichaceae.	E	2.81471	0.00168215	All
348	Bacteria.Firmicutes.Erysipelotrichi.Erysipelotrichales.Erysipelotrichaceae.	E	2.5329	0.00138379	B
349	Bacteria.Firmicutes.Erysipelotrichi.Erysipelotrichales.Erysipelotrichaceae.	E	2.89004	0.00344469	C
350	Bacteria.Firmicutes.Erysipelotrichi.Erysipelotrichales.Erysipelotrichaceae.Catenibacterium	E	3.26957	0.000980366	A
351	Bacteria.Firmicutes.Erysipelotrichi.Erysipelotrichales.Erysipelotrichaceae.RFN20	E	2.65416	0.000385747	A
352	Bacteria.Firmicutes.Erysipelotrichi.Erysipelotrichales.Erysipelotrichaceae.RFN20	E	2.45148	5.25022e-07	All
353	Bacteria.Firmicutes.Erysipelotrichi.Erysipelotrichales.Erysipelotrichaceae.RFN20	E	2.61073	0.000644126	B
354	Bacteria.Firmicutes.Erysipelotrichi.Erysipelotrichales.Erysipelotrichaceae.RFN20	E	3.25368	0.0030358	C
355	Bacteria.Lentisphaerae	E	2.57585	0.00052997	A
356	Bacteria.Lentisphaerae	E	3.04981	2.04811e-08	All
357	Bacteria.Lentisphaerae	E	3.10719	0.000124236	B
358	Bacteria.Lentisphaerae	E	3.3013	0.0030358	C
359	Bacteria.Lentisphaerae._Lentisphaeria_	E	2.57585	0.00052997	A
360	Bacteria.Lentisphaerae._Lentisphaeria_	E	3.04981	2.04811e-08	All
361	Bacteria.Lentisphaerae._Lentisphaeria_	E	3.10719	0.000124236	B
362	Bacteria.Lentisphaerae._Lentisphaeria_	E	3.3013	0.0030358	C
363	Bacteria.Lentisphaerae._Lentisphaeria_.Victivallales	E	2.57585	0.00052997	A
364	Bacteria.Lentisphaerae._Lentisphaeria_.Victivallales	E	3.04981	2.04811e-08	All
365	Bacteria.Lentisphaerae._Lentisphaeria_.Victivallales	E	3.10719	0.000124236	B
366	Bacteria.Lentisphaerae._Lentisphaeria_.Victivallales	E	3.3013	0.0030358	C
367	Bacteria.Lentisphaerae._Lentisphaeria_.Victivallales.Victivallaceae	E	2.57585	0.00052997	A
368	Bacteria.Lentisphaerae._Lentisphaeria_.Victivallales.Victivallaceae	E	3.04981	2.04811e-08	All
369	Bacteria.Lentisphaerae._Lentisphaeria_.Victivallales.Victivallaceae	E	3.10719	0.000124236	B
370	Bacteria.Lentisphaerae._Lentisphaeria_.Victivallales.Victivallaceae	E	3.3013	0.0030358	C
371	Bacteria.Lentisphaerae._Lentisphaeria_.Victivallales.Victivallaceae.	E	2.57585	0.00052997	A
372	Bacteria.Lentisphaerae._Lentisphaeria_.Victivallales.Victivallaceae.	E	3.04981	2.04811e-08	All
373	Bacteria.Lentisphaerae._Lentisphaeria_.Victivallales.Victivallaceae.	E	3.10719	0.000124236	B
374	Bacteria.Lentisphaerae._Lentisphaeria_.Victivallales.Victivallaceae.	E	3.3013	0.0030358	C
375	Bacteria.Other	E	2.76284	0.000123607	B
376	Bacteria.Other.Other	E	2.76284	0.000123607	B
377	Bacteria.Other.Other.Other	E	2.76284	0.000123607	B
378	Bacteria.Other.Other.Other.Other	E	2.76284	0.000123607	B
379	Bacteria.Other.Other.Other.Other.Other	E	2.76284	0.000123607	B
380	Bacteria.Proteobacteria	E	4.34198	0.00337487	All
381	Bacteria.Proteobacteria	E	4.63181	0.000169439	C
382	Bacteria.Proteobacteria.Alphaproteobacteria	E	4.57257	0.000169439	C
383	Bacteria.Proteobacteria.Alphaproteobacteria.	E	4.47027	0.000169439	C
384	Bacteria.Proteobacteria.Alphaproteobacteria..	E	4.47027	0.000169439	C
385	Bacteria.Proteobacteria.Alphaproteobacteria...	E	4.47027	0.000169439	C
386	Bacteria.Proteobacteria.Alphaproteobacteria.RF32	E	3.42057	0.00857741	All
387	Bacteria.Proteobacteria.Alphaproteobacteria.RF32	E	3.89695	0.000169439	C
388	Bacteria.Proteobacteria.Alphaproteobacteria.RF32.	E	3.42057	0.00857741	All
389	Bacteria.Proteobacteria.Alphaproteobacteria.RF32.	E	3.89695	0.000169439	C
390	Bacteria.Proteobacteria.Alphaproteobacteria.RF32..	E	3.42057	0.00857741	All
391	Bacteria.Proteobacteria.Alphaproteobacteria.RF32..	E	3.89695	0.000169439	C
392	Bacteria.Proteobacteria.Betaproteobacteria	E	4.07268	0.000385747	A
393	Bacteria.Proteobacteria.Betaproteobacteria	E	3.79792	3.2991e-07	All
394	Bacteria.Proteobacteria.Betaproteobacteria	E	3.13257	0.000289619	B
395	Bacteria.Proteobacteria.Betaproteobacteria	E	3.78285	0.000169439	C
396	Bacteria.Proteobacteria.Betaproteobacteria.Burkholderiales	E	4.07269	0.000385747	A
397	Bacteria.Proteobacteria.Betaproteobacteria.Burkholderiales	E	3.79789	3.2991e-07	All
398	Bacteria.Proteobacteria.Betaproteobacteria.Burkholderiales	E	3.13245	0.000289619	B
399	Bacteria.Proteobacteria.Betaproteobacteria.Burkholderiales	E	3.7827	0.000169439	C
400	Bacteria.Proteobacteria.Betaproteobacteria.Burkholderiales.Alcaligenaceae	E	4.12987	0.000385747	A
401	Bacteria.Proteobacteria.Betaproteobacteria.Burkholderiales.Alcaligenaceae	E	3.83953	6.8251e-10	All
402	Bacteria.Proteobacteria.Betaproteobacteria.Burkholderiales.Alcaligenaceae	E	3.19565	0.000289619	B
403	Bacteria.Proteobacteria.Betaproteobacteria.Burkholderiales.Alcaligenaceae	E	3.78756	0.000169439	C
404	Bacteria.Proteobacteria.Betaproteobacteria.Burkholderiales.Alcaligenaceae.Sutterella	E	4.12987	0.000385747	A
405	Bacteria.Proteobacteria.Betaproteobacteria.Burkholderiales.Alcaligenaceae.Sutterella	E	3.83953	6.8251e-10	All
406	Bacteria.Proteobacteria.Betaproteobacteria.Burkholderiales.Alcaligenaceae.Sutterella	E	3.19565	0.000289619	B
407	Bacteria.Proteobacteria.Betaproteobacteria.Burkholderiales.Alcaligenaceae.Sutterella	E	3.78756	0.000169439	C
408	Bacteria.Proteobacteria.Betaproteobacteria.Burkholderiales.Oxalobacteraceae.Ralstonia	E	3.22002	0.00445913	A
409	Bacteria.Proteobacteria.Epsilonproteobacteria	E	3.33903	0.00855167	B
410	Bacteria.Proteobacteria.Epsilonproteobacteria.Campylobacterales	E	3.33903	0.00855167	B
411	Bacteria.Proteobacteria.Epsilonproteobacteria.Campylobacterales.Campylobacteraceae	E	3.33903	0.00855167	B
412	Bacteria.Proteobacteria.Epsilonproteobacteria.Campylobacterales.Campylobacteraceae.Campylobacter	E	3.33903	0.00855167	B
413	Bacteria.Proteobacteria.Gammaproteobacteria.Aeromonadales.Succinivibrionaceae.Ruminobacter	E	4.68265	0.000124236	B
414	Bacteria.Proteobacteria.Gammaproteobacteria.Aeromonadales.Succinivibrionaceae.Ruminobacter	E	3.02762	0.00344469	C
415	Bacteria.Proteobacteria.Gammaproteobacteria.Pasteurellales.Pasteurellaceae.Aggregatibacter	E	3.52112	0.0058436	B
416	Bacteria.Spirochaetes	E	4.4608	0.00234579	A
417	Bacteria.Spirochaetes	E	4.51704	0.00344469	C
418	Bacteria.Spirochaetes.Spirochaetes	E	4.4608	0.00234579	A
419	Bacteria.Spirochaetes.Spirochaetes	E	4.54121	0.00095025	C
420	Bacteria.Spirochaetes.Spirochaetes.Spirochaetales	E	4.4608	0.00234579	A
421	Bacteria.Spirochaetes.Spirochaetes.Spirochaetales	E	4.54121	0.00095025	C
422	Bacteria.Spirochaetes.Spirochaetes.Spirochaetales.Spirochaetaceae	E	4.4608	0.00234579	A
423	Bacteria.Spirochaetes.Spirochaetes.Spirochaetales.Spirochaetaceae	E	4.54121	0.00095025	C
424	Bacteria.Spirochaetes.Spirochaetes.Spirochaetales.Spirochaetaceae.Treponema	E	4.4608	0.00234579	A
425	Bacteria.Spirochaetes.Spirochaetes.Spirochaetales.Spirochaetaceae.Treponema	E	4.54121	0.00095025	C
426	Bacteria.Tenericutes	E	3.30842	0.000980366	A
427	Bacteria.Tenericutes	E	3.40238	0.00195958	All
428	Bacteria.Tenericutes	E	3.66317	0.000169439	C
429	Bacteria.Tenericutes.Mollicutes	E	3.28149	0.0023949	All
430	Bacteria.Tenericutes.Mollicutes	E	3.64095	0.000169439	C
431	Bacteria.Tenericutes.Mollicutes.Anaeroplasmatales	E	3.10632	0.000385747	A
432	Bacteria.Tenericutes.Mollicutes.Anaeroplasmatales	E	3.35158	9.80203e-11	All
433	Bacteria.Tenericutes.Mollicutes.Anaeroplasmatales	E	2.90115	0.000124236	B
434	Bacteria.Tenericutes.Mollicutes.Anaeroplasmatales	E	3.679	0.000169439	C
435	Bacteria.Tenericutes.Mollicutes.Anaeroplasmatales.Anaeroplasmataceae	E	3.10632	0.000385747	A
436	Bacteria.Tenericutes.Mollicutes.Anaeroplasmatales.Anaeroplasmataceae	E	3.35158	9.80203e-11	All
437	Bacteria.Tenericutes.Mollicutes.Anaeroplasmatales.Anaeroplasmataceae	E	2.90115	0.000124236	B
438	Bacteria.Tenericutes.Mollicutes.Anaeroplasmatales.Anaeroplasmataceae	E	3.679	0.000169439	C
439	Bacteria.Tenericutes.Mollicutes.Anaeroplasmatales.Anaeroplasmataceae.	E	2.56345	0.000385747	A
440	Bacteria.Tenericutes.Mollicutes.Anaeroplasmatales.Anaeroplasmataceae.	E	3.49531	0.00344469	C
441	Bacteria.Tenericutes.Mollicutes.Anaeroplasmatales.Anaeroplasmataceae.Anaeroplasma	E	3.01853	0.000385747	A
442	Bacteria.Tenericutes.Mollicutes.Anaeroplasmatales.Anaeroplasmataceae.Anaeroplasma	E	3.06883	2.76017e-09	All
443	Bacteria.Tenericutes.Mollicutes.Anaeroplasmatales.Anaeroplasmataceae.Anaeroplasma	E	2.90115	0.000124236	B
444	Bacteria.Tenericutes.Mollicutes.Anaeroplasmatales.Anaeroplasmataceae.Anaeroplasma	E	3.34197	0.000168483	C
445	Bacteria.Tenericutes.RF3	E	3.11398	0.000980366	A
446	Bacteria.Tenericutes.RF3	E	2.79107	0.00408479	All
447	Bacteria.Tenericutes.RF3	E	2.66219	0.000124236	B
448	Bacteria.Tenericutes.RF3	E	2.76726	0.00265158	C
449	Bacteria.Tenericutes.RF3.ML615J_28	E	3.11398	0.000980366	A
450	Bacteria.Tenericutes.RF3.ML615J_28	E	2.79107	0.00408479	All
451	Bacteria.Tenericutes.RF3.ML615J_28	E	2.66219	0.000124236	B
452	Bacteria.Tenericutes.RF3.ML615J_28	E	2.76726	0.00265158	C
453	Bacteria.Tenericutes.RF3.ML615J_28.	E	3.11398	0.000980366	A
454	Bacteria.Tenericutes.RF3.ML615J_28.	E	2.79107	0.00408479	All
455	Bacteria.Tenericutes.RF3.ML615J_28.	E	2.66219	0.000124236	B
456	Bacteria.Tenericutes.RF3.ML615J_28.	E	2.76726	0.00265158	C
457	Bacteria.Tenericutes.RF3.ML615J_28..	E	3.11398	0.000980366	A
458	Bacteria.Tenericutes.RF3.ML615J_28..	E	2.79107	0.00408479	All
459	Bacteria.Tenericutes.RF3.ML615J_28..	E	2.66219	0.000124236	B
460	Bacteria.Tenericutes.RF3.ML615J_28..	E	2.76726	0.00265158	C
461	Bacteria.Verrucomicrobia	E	3.26583	0.00387592	C
462	Bacteria.Verrucomicrobia.Verruco_5	E	3.26555	0.0030358	C
463	Bacteria.Verrucomicrobia.Verruco_5.WCHB1_41	E	3.26555	0.0030358	C
464	Bacteria.Verrucomicrobia.Verruco_5.WCHB1_41.RFP12	E	3.26555	0.0030358	C
465	Bacteria.Verrucomicrobia.Verruco_5.WCHB1_41.RFP12.	E	3.26555	0.0030358	C
466	Unassigned	E	3.41128	0.000980366	A
467	Unassigned	E	3.7627	2.81403e-07	All
468	Unassigned	E	4.14317	0.00344469	C
469	Unassigned.Other	E	3.41128	0.000980366	A
470	Unassigned.Other	E	3.7627	2.81403e-07	All
471	Unassigned.Other	E	4.14317	0.00344469	C
472	Unassigned.Other.Other	E	3.41128	0.000980366	A
473	Unassigned.Other.Other	E	3.7627	2.81403e-07	All
474	Unassigned.Other.Other	E	4.14317	0.00344469	C
475	Unassigned.Other.Other.Other	E	3.41128	0.000980366	A
476	Unassigned.Other.Other.Other	E	3.7627	2.81403e-07	All
477	Unassigned.Other.Other.Other	E	4.14317	0.00344469	C
478	Unassigned.Other.Other.Other.Other	E	3.41128	0.000980366	A
479	Unassigned.Other.Other.Other.Other	E	3.7627	2.81403e-07	All
480	Unassigned.Other.Other.Other.Other	E	4.14317	0.00344469	C
481	Unassigned.Other.Other.Other.Other.Other	E	3.41128	0.000980366	A
482	Unassigned.Other.Other.Other.Other.Other	E	3.7627	2.81403e-07	All
483	Unassigned.Other.Other.Other.Other.Other	E	4.14317	0.00344469	C
484	Bacteria.Bacteroidetes.Bacteroidia.Bacteroidales.	R	3.73616	0.00447365	A
485	Bacteria.Bacteroidetes.Bacteroidia.Bacteroidales..	R	3.73616	0.00447365	A
486	Bacteria.Bacteroidetes.Bacteroidia.Bacteroidales._Odoribacteraceae_	R	2.38198	0.00357124	A
487	Bacteria.Bacteroidetes.Bacteroidia.Bacteroidales._Odoribacteraceae_.Odoribacter	R	2.55951	0.000289619	A
488	Bacteria.Bacteroidetes.Bacteroidia.Bacteroidales._Paraprevotellaceae_	R	3.56221	0.000124236	A
489	Bacteria.Bacteroidetes.Bacteroidia.Bacteroidales._Paraprevotellaceae_	R	3.1357	0.000281894	All
490	Bacteria.Bacteroidetes.Bacteroidia.Bacteroidales._Paraprevotellaceae_	R	3.43213	0.000212829	B
491	Bacteria.Bacteroidetes.Bacteroidia.Bacteroidales._Paraprevotellaceae_._Prevotella_	R	3.56221	0.000124236	A
492	Bacteria.Bacteroidetes.Bacteroidia.Bacteroidales._Paraprevotellaceae_._Prevotella_	R	3.1357	0.000281894	All
493	Bacteria.Bacteroidetes.Bacteroidia.Bacteroidales._Paraprevotellaceae_._Prevotella_	R	3.43213	0.000212829	B
494	Bacteria.Bacteroidetes.Bacteroidia.Bacteroidales.Other	R	3.50536	0.000546622	C
495	Bacteria.Bacteroidetes.Bacteroidia.Bacteroidales.Other.Other	R	3.50536	0.000546622	C
496	Bacteria.Bacteroidetes.Bacteroidia.Bacteroidales.RF16	R	3.36318	0.000169439	C
497	Bacteria.Bacteroidetes.Bacteroidia.Bacteroidales.RF16.	R	3.36318	0.000169439	C
498	Bacteria.Cyanobacteria	R	3.74691	0.00283754	A
499	Bacteria.Cyanobacteria	R	3.85175	6.28027e-08	All
500	Bacteria.Cyanobacteria	R	3.73905	0.000386731	B
501	Bacteria.Cyanobacteria	R	4.01469	0.000169439	C
502	Bacteria.Cyanobacteria.4C0d_2	R	3.74691	0.00283754	A
503	Bacteria.Cyanobacteria.4C0d_2	R	3.85175	6.28027e-08	All
504	Bacteria.Cyanobacteria.4C0d_2	R	3.73905	0.000386731	B
505	Bacteria.Cyanobacteria.4C0d_2	R	4.01469	0.000169439	C
506	Bacteria.Cyanobacteria.4C0d_2.YS2	R	3.74691	0.00283754	A
507	Bacteria.Cyanobacteria.4C0d_2.YS2	R	3.85175	6.28027e-08	All
508	Bacteria.Cyanobacteria.4C0d_2.YS2	R	3.73905	0.000386731	B
509	Bacteria.Cyanobacteria.4C0d_2.YS2	R	4.01469	0.000169439	C
510	Bacteria.Cyanobacteria.4C0d_2.YS2.	R	3.74691	0.00283754	A
511	Bacteria.Cyanobacteria.4C0d_2.YS2.	R	3.85175	6.28027e-08	All
512	Bacteria.Cyanobacteria.4C0d_2.YS2.	R	3.73905	0.000386731	B
513	Bacteria.Cyanobacteria.4C0d_2.YS2.	R	4.01469	0.000169439	C
514	Bacteria.Cyanobacteria.4C0d_2.YS2..	R	3.74691	0.00283754	A
515	Bacteria.Cyanobacteria.4C0d_2.YS2..	R	3.85175	6.28027e-08	All
516	Bacteria.Cyanobacteria.4C0d_2.YS2..	R	3.73905	0.000386731	B
517	Bacteria.Cyanobacteria.4C0d_2.YS2..	R	4.01469	0.000169439	C
518	Bacteria.Elusimicrobia	R	4.12682	0.00615084	All
519	Bacteria.Elusimicrobia	R	4.30577	0.000212829	B
520	Bacteria.Elusimicrobia	R	4.31779	0.000169439	C
521	Bacteria.Elusimicrobia.Elusimicrobia	R	4.12682	0.00615084	All
522	Bacteria.Elusimicrobia.Elusimicrobia	R	4.30577	0.000212829	B
523	Bacteria.Elusimicrobia.Elusimicrobia	R	4.31779	0.000169439	C
524	Bacteria.Elusimicrobia.Elusimicrobia.Elusimicrobiales	R	4.12682	0.00615084	All
525	Bacteria.Elusimicrobia.Elusimicrobia.Elusimicrobiales	R	4.30577	0.000212829	B
526	Bacteria.Elusimicrobia.Elusimicrobia.Elusimicrobiales	R	4.31779	0.000169439	C
527	Bacteria.Elusimicrobia.Elusimicrobia.Elusimicrobiales.Elusimicrobiaceae	R	4.12682	0.00615084	All
528	Bacteria.Elusimicrobia.Elusimicrobia.Elusimicrobiales.Elusimicrobiaceae	R	4.30577	0.000212829	B
529	Bacteria.Elusimicrobia.Elusimicrobia.Elusimicrobiales.Elusimicrobiaceae	R	4.31779	0.000169439	C
530	Bacteria.Elusimicrobia.Elusimicrobia.Elusimicrobiales.Elusimicrobiaceae.	R	4.12682	0.00615084	All
531	Bacteria.Elusimicrobia.Elusimicrobia.Elusimicrobiales.Elusimicrobiaceae.	R	4.30577	0.000212829	B
532	Bacteria.Elusimicrobia.Elusimicrobia.Elusimicrobiales.Elusimicrobiaceae.	R	4.31779	0.000169439	C
533	Bacteria.Firmicutes.Clostridia	R	4.49791	0.00447365	A
534	Bacteria.Firmicutes.Clostridia.Clostridiales	R	4.49791	0.00447365	A
535	Bacteria.Firmicutes.Clostridia.Clostridiales.	R	4.01001	0.000124236	A
536	Bacteria.Firmicutes.Clostridia.Clostridiales..	R	4.01001	0.000124236	A
537	Bacteria.Firmicutes.Clostridia.Clostridiales.Christensenellaceae	R	2.47786	0.00176634	A
538	Bacteria.Firmicutes.Clostridia.Clostridiales.Christensenellaceae.	R	2.47786	0.00176634	A
539	Bacteria.Firmicutes.Clostridia.Clostridiales.Clostridiaceae.Clostridium	R	3.1382	0.000124236	A
540	Bacteria.Firmicutes.Clostridia.Clostridiales.Clostridiaceae.Clostridium	R	3.90755	0.000228949	C
541	Bacteria.Firmicutes.Clostridia.Clostridiales.Lachnospiraceae	R	4.4842	0.000124236	A
542	Bacteria.Firmicutes.Clostridia.Clostridiales.Lachnospiraceae	R	4.1007	0.000678676	All
543	Bacteria.Firmicutes.Clostridia.Clostridiales.Lachnospiraceae	R	4.04734	0.000287702	B
544	Bacteria.Firmicutes.Clostridia.Clostridiales.Lachnospiraceae.	R	4.19147	0.000124236	A
545	Bacteria.Firmicutes.Clostridia.Clostridiales.Lachnospiraceae.	R	3.92466	1.96782e-08	All
546	Bacteria.Firmicutes.Clostridia.Clostridiales.Lachnospiraceae.	R	3.8823	0.000212829	B
547	Bacteria.Firmicutes.Clostridia.Clostridiales.Lachnospiraceae._Ruminococcus_	R	2.78372	0.000165522	A
548	Bacteria.Firmicutes.Clostridia.Clostridiales.Lachnospiraceae.Anaerostipes	R	2.52448	0.00138379	A
549	Bacteria.Firmicutes.Clostridia.Clostridiales.Lachnospiraceae.Anaerostipes	R	2.65147	0.00876483	C
550	Bacteria.Firmicutes.Clostridia.Clostridiales.Lachnospiraceae.Lachnospira	R	3.40097	0.000380365	A
551	Bacteria.Firmicutes.Clostridia.Clostridiales.Lachnospiraceae.Lachnospira	R	3.25847	6.59276e-06	All
552	Bacteria.Firmicutes.Clostridia.Clostridiales.Lachnospiraceae.Lachnospira	R	3.46472	0.000212829	B
553	Bacteria.Firmicutes.Clostridia.Clostridiales.Lachnospiraceae.Other	R	4.08431	0.000124236	A
554	Bacteria.Firmicutes.Clostridia.Clostridiales.Other	R	4.04377	0.000546622	C
555	Bacteria.Firmicutes.Clostridia.Clostridiales.Other.Other	R	4.04377	0.000546622	C
556	Bacteria.Firmicutes.Clostridia.Clostridiales.Ruminococcaceae	R	4.2042	0.00699532	C
557	Bacteria.Firmicutes.Clostridia.Clostridiales.Ruminococcaceae.Faecalibacterium	R	3.5043	0.00057785	All
558	Bacteria.Firmicutes.Clostridia.Clostridiales.Ruminococcaceae.Faecalibacterium	R	3.33726	0.00156035	B
559	Bacteria.Firmicutes.Clostridia.Clostridiales.Ruminococcaceae.Faecalibacterium	R	3.76419	0.000169439	C
560	Bacteria.Firmicutes.Clostridia.Clostridiales.Ruminococcaceae.Other	R	3.68132	0.000352835	All
561	Bacteria.Firmicutes.Clostridia.Clostridiales.Ruminococcaceae.Other	R	3.6668	0.00430894	B
562	Bacteria.Firmicutes.Clostridia.Clostridiales.Ruminococcaceae.Other	R	3.85738	0.000169439	C
563	Bacteria.Firmicutes.Clostridia.Clostridiales.Ruminococcaceae.Ruminococcus	R	3.31488	0.000165522	A
564	Bacteria.Firmicutes.Clostridia.Clostridiales.Veillonellaceae	R	3.31511	0.00557799	A
565	Bacteria.Firmicutes.Clostridia.Clostridiales.Veillonellaceae.Anaerovibrio	R	2.57997	0.00339621	C
566	Bacteria.Firmicutes.Clostridia.Clostridiales.Veillonellaceae.Phascolarctobacterium	R	3.35686	0.00557799	A
567	Bacteria.Firmicutes.Clostridia.Clostridiales.Veillonellaceae.Phascolarctobacterium	R	3.26126	0.000307674	C
568	Bacteria.Firmicutes.Erysipelotrichi	R	3.91019	0.000165522	A
569	Bacteria.Firmicutes.Erysipelotrichi	R	3.77903	5.74407e-06	All
570	Bacteria.Firmicutes.Erysipelotrichi	R	4.08015	0.000212829	B
571	Bacteria.Firmicutes.Erysipelotrichi.Erysipelotrichales	R	3.91019	0.000165522	A
572	Bacteria.Firmicutes.Erysipelotrichi.Erysipelotrichales	R	3.77903	5.74407e-06	All
573	Bacteria.Firmicutes.Erysipelotrichi.Erysipelotrichales	R	4.08015	0.000212829	B
574	Bacteria.Firmicutes.Erysipelotrichi.Erysipelotrichales.Erysipelotrichaceae	R	3.91019	0.000165522	A
575	Bacteria.Firmicutes.Erysipelotrichi.Erysipelotrichales.Erysipelotrichaceae	R	3.77903	5.74407e-06	All
576	Bacteria.Firmicutes.Erysipelotrichi.Erysipelotrichales.Erysipelotrichaceae	R	4.08015	0.000212829	B
577	Bacteria.Firmicutes.Erysipelotrichi.Erysipelotrichales.Erysipelotrichaceae.	R	3.20006	0.000646749	A
578	Bacteria.Firmicutes.Erysipelotrichi.Erysipelotrichales.Erysipelotrichaceae.	R	2.97314	3.67131e-05	All
579	Bacteria.Firmicutes.Erysipelotrichi.Erysipelotrichales.Erysipelotrichaceae.	R	2.89461	0.000212829	B
580	Bacteria.Firmicutes.Erysipelotrichi.Erysipelotrichales.Erysipelotrichaceae.	R	2.89105	0.000169439	C
581	Bacteria.Firmicutes.Erysipelotrichi.Erysipelotrichales.Erysipelotrichaceae.Catenibacterium	R	3.95777	0.000124236	A
582	Bacteria.Firmicutes.Erysipelotrichi.Erysipelotrichales.Erysipelotrichaceae.Catenibacterium	R	3.83934	2.53201e-08	All
583	Bacteria.Firmicutes.Erysipelotrichi.Erysipelotrichales.Erysipelotrichaceae.Catenibacterium	R	4.06095	0.000212829	B
584	Bacteria.Firmicutes.Erysipelotrichi.Erysipelotrichales.Erysipelotrichaceae.Catenibacterium	R	3.23086	0.00095025	C
585	Bacteria.Firmicutes.Erysipelotrichi.Erysipelotrichales.Erysipelotrichaceae.RFN20	R	2.60433	0.000124236	A
586	Bacteria.Firmicutes.Erysipelotrichi.Erysipelotrichales.Erysipelotrichaceae.RFN20	R	2.41159	1.65449e-08	All
587	Bacteria.Firmicutes.Erysipelotrichi.Erysipelotrichales.Erysipelotrichaceae.RFN20	R	3.17838	0.0042944	B
588	Bacteria.Firmicutes.Erysipelotrichi.Erysipelotrichales.Erysipelotrichaceae.RFN20	R	2.79908	0.000169439	C
589	Bacteria.Lentisphaerae	R	2.66193	0.000124236	A
590	Bacteria.Lentisphaerae	R	3.14498	8.26111e-10	All
591	Bacteria.Lentisphaerae	R	3.27166	0.000212829	B
592	Bacteria.Lentisphaerae	R	3.31274	0.000169439	C
593	Bacteria.Lentisphaerae._Lentisphaeria_	R	2.66193	0.000124236	A
594	Bacteria.Lentisphaerae._Lentisphaeria_	R	3.14498	8.26111e-10	All
595	Bacteria.Lentisphaerae._Lentisphaeria_	R	3.27166	0.000212829	B
596	Bacteria.Lentisphaerae._Lentisphaeria_	R	3.31274	0.000169439	C
597	Bacteria.Lentisphaerae._Lentisphaeria_.Victivallales	R	2.66193	0.000124236	A
598	Bacteria.Lentisphaerae._Lentisphaeria_.Victivallales	R	3.14498	8.26111e-10	All
599	Bacteria.Lentisphaerae._Lentisphaeria_.Victivallales	R	3.27166	0.000212829	B
600	Bacteria.Lentisphaerae._Lentisphaeria_.Victivallales	R	3.31274	0.000169439	C
601	Bacteria.Lentisphaerae._Lentisphaeria_.Victivallales.Victivallaceae	R	2.66193	0.000124236	A
602	Bacteria.Lentisphaerae._Lentisphaeria_.Victivallales.Victivallaceae	R	3.14498	8.26111e-10	All
603	Bacteria.Lentisphaerae._Lentisphaeria_.Victivallales.Victivallaceae	R	3.27166	0.000212829	B
604	Bacteria.Lentisphaerae._Lentisphaeria_.Victivallales.Victivallaceae	R	3.31274	0.000169439	C
605	Bacteria.Lentisphaerae._Lentisphaeria_.Victivallales.Victivallaceae.	R	2.66193	0.000124236	A
606	Bacteria.Lentisphaerae._Lentisphaeria_.Victivallales.Victivallaceae.	R	3.14498	8.26111e-10	All
607	Bacteria.Lentisphaerae._Lentisphaeria_.Victivallales.Victivallaceae.	R	3.27166	0.000212829	B
608	Bacteria.Lentisphaerae._Lentisphaeria_.Victivallales.Victivallaceae.	R	3.31274	0.000169439	C
609	Bacteria.Other	R	2.86404	0.000211663	B
610	Bacteria.Other.Other	R	2.86404	0.000211663	B
611	Bacteria.Other.Other.Other	R	2.86404	0.000211663	B
612	Bacteria.Other.Other.Other.Other	R	2.86404	0.000211663	B
613	Bacteria.Other.Other.Other.Other.Other	R	2.86404	0.000211663	B
614	Bacteria.Proteobacteria	R	4.77649	0.000124236	A
615	Bacteria.Proteobacteria	R	4.6453	0.000491117	All
616	Bacteria.Proteobacteria	R	4.7334	0.000687104	B
617	Bacteria.Proteobacteria	R	4.57344	0.000169439	C
618	Bacteria.Proteobacteria.Alphaproteobacteria	R	4.29521	0.000169439	C
619	Bacteria.Proteobacteria.Alphaproteobacteria.	R	4.14366	0.000169439	C
620	Bacteria.Proteobacteria.Alphaproteobacteria..	R	4.14366	0.000169439	C
621	Bacteria.Proteobacteria.Alphaproteobacteria...	R	4.14366	0.000169439	C
622	Bacteria.Proteobacteria.Alphaproteobacteria.RF32	R	3.76694	0.000169439	C
623	Bacteria.Proteobacteria.Alphaproteobacteria.RF32.	R	3.76694	0.000169439	C
624	Bacteria.Proteobacteria.Alphaproteobacteria.RF32..	R	3.76694	0.000169439	C
625	Bacteria.Proteobacteria.Betaproteobacteria	R	4.17382	0.000124236	A
626	Bacteria.Proteobacteria.Betaproteobacteria	R	3.96007	1.56287e-09	All
627	Bacteria.Proteobacteria.Betaproteobacteria	R	3.42613	0.000212829	B
628	Bacteria.Proteobacteria.Betaproteobacteria	R	3.91791	0.000169439	C
629	Bacteria.Proteobacteria.Betaproteobacteria.Burkholderiales	R	4.17381	0.000124236	A
630	Bacteria.Proteobacteria.Betaproteobacteria.Burkholderiales	R	3.96008	1.56287e-09	All
631	Bacteria.Proteobacteria.Betaproteobacteria.Burkholderiales	R	3.42622	0.000212829	B
632	Bacteria.Proteobacteria.Betaproteobacteria.Burkholderiales	R	3.91793	0.000169439	C
633	Bacteria.Proteobacteria.Betaproteobacteria.Burkholderiales.Alcaligenaceae	R	4.22037	0.000124236	A
634	Bacteria.Proteobacteria.Betaproteobacteria.Burkholderiales.Alcaligenaceae	R	3.98735	7.07732e-11	All
635	Bacteria.Proteobacteria.Betaproteobacteria.Burkholderiales.Alcaligenaceae	R	3.45609	0.000212829	B
636	Bacteria.Proteobacteria.Betaproteobacteria.Burkholderiales.Alcaligenaceae	R	3.91825	0.000169439	C
637	Bacteria.Proteobacteria.Betaproteobacteria.Burkholderiales.Alcaligenaceae.Sutterella	R	4.22037	0.000124236	A
638	Bacteria.Proteobacteria.Betaproteobacteria.Burkholderiales.Alcaligenaceae.Sutterella	R	3.98735	7.07732e-11	All
639	Bacteria.Proteobacteria.Betaproteobacteria.Burkholderiales.Alcaligenaceae.Sutterella	R	3.45609	0.000212829	B
640	Bacteria.Proteobacteria.Betaproteobacteria.Burkholderiales.Alcaligenaceae.Sutterella	R	3.91825	0.000169439	C
641	Bacteria.Proteobacteria.Deltaproteobacteria	R	3.17056	0.000165522	A
642	Bacteria.Proteobacteria.Deltaproteobacteria	R	3.0726	6.11028e-07	All
643	Bacteria.Proteobacteria.Deltaproteobacteria	R	2.67899	0.000386731	B
644	Bacteria.Proteobacteria.Deltaproteobacteria	R	3.19706	0.000169439	C
645	Bacteria.Proteobacteria.Deltaproteobacteria.Desulfovibrionales	R	3.17056	0.000165522	A
646	Bacteria.Proteobacteria.Deltaproteobacteria.Desulfovibrionales	R	3.0726	6.11028e-07	All
647	Bacteria.Proteobacteria.Deltaproteobacteria.Desulfovibrionales	R	2.67899	0.000386731	B
648	Bacteria.Proteobacteria.Deltaproteobacteria.Desulfovibrionales	R	3.19706	0.000169439	C
649	Bacteria.Proteobacteria.Deltaproteobacteria.Desulfovibrionales.Desulfovibrionaceae	R	3.17056	0.000165522	A
650	Bacteria.Proteobacteria.Deltaproteobacteria.Desulfovibrionales.Desulfovibrionaceae	R	3.0726	6.11028e-07	All
651	Bacteria.Proteobacteria.Deltaproteobacteria.Desulfovibrionales.Desulfovibrionaceae	R	2.67899	0.000386731	B
652	Bacteria.Proteobacteria.Deltaproteobacteria.Desulfovibrionales.Desulfovibrionaceae	R	3.19706	0.000169439	C
653	Bacteria.Proteobacteria.Deltaproteobacteria.Desulfovibrionales.Desulfovibrionaceae.	R	2.82346	0.000151074	C
654	Bacteria.Proteobacteria.Deltaproteobacteria.Desulfovibrionales.Desulfovibrionaceae.Bilophila	R	2.6605	0.000837348	A
655	Bacteria.Proteobacteria.Deltaproteobacteria.Desulfovibrionales.Desulfovibrionaceae.Bilophila	R	2.62012	2.84346e-07	All
656	Bacteria.Proteobacteria.Deltaproteobacteria.Desulfovibrionales.Desulfovibrionaceae.Bilophila	R	2.73783	0.000287702	B
657	Bacteria.Proteobacteria.Deltaproteobacteria.Desulfovibrionales.Desulfovibrionaceae.Bilophila	R	2.81945	0.000169439	C
658	Bacteria.Proteobacteria.Deltaproteobacteria.Desulfovibrionales.Desulfovibrionaceae.Desulfovibrio	R	3.12316	0.000165522	A
659	Bacteria.Proteobacteria.Deltaproteobacteria.Desulfovibrionales.Desulfovibrionaceae.Desulfovibrio	R	2.89178	0.00265857	All
660	Bacteria.Proteobacteria.Deltaproteobacteria.Desulfovibrionales.Desulfovibrionaceae.Desulfovibrio	R	2.94578	0.000722671	C
661	Bacteria.Proteobacteria.Epsilonproteobacteria	R	2.48804	0.00447365	A
662	Bacteria.Proteobacteria.Epsilonproteobacteria.Campylobacterales	R	2.48804	0.00447365	A
663	Bacteria.Proteobacteria.Epsilonproteobacteria.Campylobacterales.Campylobacteraceae	R	2.48804	0.00447365	A
664	Bacteria.Proteobacteria.Epsilonproteobacteria.Campylobacterales.Campylobacteraceae.Campylobacter	R	2.48804	0.00447365	A
665	Bacteria.Proteobacteria.Gammaproteobacteria	R	4.63484	0.000124236	A
666	Bacteria.Proteobacteria.Gammaproteobacteria	R	4.5719	0.0066756	All
667	Bacteria.Proteobacteria.Gammaproteobacteria	R	4.89135	0.000516932	B
668	Bacteria.Proteobacteria.Gammaproteobacteria	R	3.89427	0.000169439	C
669	Bacteria.Proteobacteria.Gammaproteobacteria.Aeromonadales	R	4.67681	0.000124236	A
670	Bacteria.Proteobacteria.Gammaproteobacteria.Aeromonadales	R	4.58862	0.00266205	All
671	Bacteria.Proteobacteria.Gammaproteobacteria.Aeromonadales	R	4.89205	0.000516932	B
672	Bacteria.Proteobacteria.Gammaproteobacteria.Aeromonadales	R	3.905	0.000169439	C
673	Bacteria.Proteobacteria.Gammaproteobacteria.Aeromonadales.Succinivibrionaceae	R	4.67681	0.000124236	A
674	Bacteria.Proteobacteria.Gammaproteobacteria.Aeromonadales.Succinivibrionaceae	R	4.58862	0.00266205	All
675	Bacteria.Proteobacteria.Gammaproteobacteria.Aeromonadales.Succinivibrionaceae	R	4.89205	0.000516932	B
676	Bacteria.Proteobacteria.Gammaproteobacteria.Aeromonadales.Succinivibrionaceae	R	3.905	0.000169439	C
677	Bacteria.Proteobacteria.Gammaproteobacteria.Aeromonadales.Succinivibrionaceae.	R	3.14659	0.000276695	C
678	Bacteria.Proteobacteria.Gammaproteobacteria.Aeromonadales.Succinivibrionaceae.Ruminobacter	R	4.92128	0.000212829	B
679	Bacteria.Proteobacteria.Gammaproteobacteria.Aeromonadales.Succinivibrionaceae.Ruminobacter	R	3.79861	0.000169439	C
680	Bacteria.Proteobacteria.Gammaproteobacteria.Aeromonadales.Succinivibrionaceae.Succinivibrio	R	4.67682	0.000124236	A
681	Bacteria.Proteobacteria.Gammaproteobacteria.Aeromonadales.Succinivibrionaceae.Succinivibrio	R	3.24189	0.00161652	C
682	Bacteria.Spirochaetes	R	4.47037	0.00138379	A
683	Bacteria.Spirochaetes.Spirochaetes	R	4.47037	0.00138379	A
684	Bacteria.Spirochaetes.Spirochaetes.Spirochaetales	R	4.47037	0.00138379	A
685	Bacteria.Spirochaetes.Spirochaetes.Spirochaetales.Spirochaetaceae	R	4.47037	0.00138379	A
686	Bacteria.Spirochaetes.Spirochaetes.Spirochaetales.Spirochaetaceae.Treponema	R	4.47037	0.00138379	A
687	Bacteria.Tenericutes	R	3.24877	0.000307674	C
688	Bacteria.Tenericutes.Mollicutes	R	3.22151	0.000411218	C
689	Bacteria.Tenericutes.Mollicutes.Anaeroplasmatales	R	2.97413	0.000124236	A
690	Bacteria.Tenericutes.Mollicutes.Anaeroplasmatales	R	3.09107	5.28204e-11	All
691	Bacteria.Tenericutes.Mollicutes.Anaeroplasmatales	R	3.0721	0.000212829	B
692	Bacteria.Tenericutes.Mollicutes.Anaeroplasmatales	R	3.30793	0.000169439	C
693	Bacteria.Tenericutes.Mollicutes.Anaeroplasmatales.Anaeroplasmataceae	R	2.97413	0.000124236	A
694	Bacteria.Tenericutes.Mollicutes.Anaeroplasmatales.Anaeroplasmataceae	R	3.09107	5.28204e-11	All
695	Bacteria.Tenericutes.Mollicutes.Anaeroplasmatales.Anaeroplasmataceae	R	3.0721	0.000212829	B
696	Bacteria.Tenericutes.Mollicutes.Anaeroplasmatales.Anaeroplasmataceae	R	3.30793	0.000169439	C
697	Bacteria.Tenericutes.Mollicutes.Anaeroplasmatales.Anaeroplasmataceae.	R	2.45371	0.000219473	A
698	Bacteria.Tenericutes.Mollicutes.Anaeroplasmatales.Anaeroplasmataceae.	R	3.26817	0.000169439	C
699	Bacteria.Tenericutes.Mollicutes.Anaeroplasmatales.Anaeroplasmataceae.Anaeroplasma	R	2.93624	0.000124236	A
700	Bacteria.Tenericutes.Mollicutes.Anaeroplasmatales.Anaeroplasmataceae.Anaeroplasma	R	2.74875	3.53185e-08	All
701	Bacteria.Tenericutes.Mollicutes.Anaeroplasmatales.Anaeroplasmataceae.Anaeroplasma	R	3.0721	0.000212829	B
702	Bacteria.Tenericutes.Mollicutes.Anaeroplasmatales.Anaeroplasmataceae.Anaeroplasma	R	2.65349	0.000168483	C
703	Bacteria.Tenericutes.RF3	R	2.89419	0.00447365	A
704	Bacteria.Tenericutes.RF3	R	2.64081	0.0026617	All
705	Bacteria.Tenericutes.RF3	R	2.65115	0.000386731	B
706	Bacteria.Tenericutes.RF3	R	2.72222	0.000168483	C
707	Bacteria.Tenericutes.RF3.ML615J_28	R	2.89419	0.00447365	A
708	Bacteria.Tenericutes.RF3.ML615J_28	R	2.64081	0.0026617	All
709	Bacteria.Tenericutes.RF3.ML615J_28	R	2.65115	0.000386731	B
710	Bacteria.Tenericutes.RF3.ML615J_28	R	2.72222	0.000168483	C
711	Bacteria.Tenericutes.RF3.ML615J_28.	R	2.89419	0.00447365	A
712	Bacteria.Tenericutes.RF3.ML615J_28.	R	2.64081	0.0026617	All
713	Bacteria.Tenericutes.RF3.ML615J_28.	R	2.65115	0.000386731	B
714	Bacteria.Tenericutes.RF3.ML615J_28.	R	2.72222	0.000168483	C
715	Bacteria.Tenericutes.RF3.ML615J_28..	R	2.89419	0.00447365	A
716	Bacteria.Tenericutes.RF3.ML615J_28..	R	2.64081	0.0026617	All
717	Bacteria.Tenericutes.RF3.ML615J_28..	R	2.65115	0.000386731	B
718	Bacteria.Tenericutes.RF3.ML615J_28..	R	2.72222	0.000168483	C
719	Bacteria.Verrucomicrobia	R	3.83989	0.000169439	C
720	Bacteria.Verrucomicrobia.Verruco_5	R	3.83978	0.000169439	C
721	Bacteria.Verrucomicrobia.Verruco_5.WCHB1_41	R	3.83978	0.000169439	C
722	Bacteria.Verrucomicrobia.Verruco_5.WCHB1_41.RFP12	R	3.83978	0.000169439	C
723	Bacteria.Verrucomicrobia.Verruco_5.WCHB1_41.RFP12.	R	3.83978	0.000169439	C
724	Unassigned	R	3.44796	0.000643379	All
725	Unassigned	R	3.90625	0.000169439	C
726	Unassigned.Other	R	3.44796	0.000643379	All
727	Unassigned.Other	R	3.90625	0.000169439	C
728	Unassigned.Other.Other	R	3.44796	0.000643379	All
729	Unassigned.Other.Other	R	3.90625	0.000169439	C
730	Unassigned.Other.Other.Other	R	3.44796	0.000643379	All
731	Unassigned.Other.Other.Other	R	3.90625	0.000169439	C
732	Unassigned.Other.Other.Other.Other	R	3.44796	0.000643379	All
733	Unassigned.Other.Other.Other.Other	R	3.90625	0.000169439	C
734	Unassigned.Other.Other.Other.Other.Other	R	3.44796	0.000643379	All
735	Unassigned.Other.Other.Other.Other.Other	R	3.90625	0.000169439	C
